# Supplementary material
Source: publisher site journal article supplement (https://www.dovepress.com/article/191486)
Supplement: Supplementary file 1 [file get_supplementary_file.php]

## Supplementary materials

Table S1 – Precision of LMCV measurements

|                       |             |               | <b>Subject</b> |          |          |
|-----------------------|-------------|---------------|----------------|----------|----------|
|                       |             |               | <b>1</b>       | <b>2</b> | <b>3</b> |
| <b>Test target 33</b> | <b>Red</b>  | <b>Mean</b>   | 0.72           | 0.84     | 0.85     |
|                       |             | <b>Range</b>  | 0.06           | 0.27     | 0.20     |
|                       |             | <b>AVDEV</b>  | 0.01           | 0.08     | 0.05     |
|                       |             | <b>SD</b>     | 0.02           | 0.10     | 0.06     |
|                       |             | <b>CV (%)</b> | 2.70           | 11.71    | 7.50     |
|                       | <b>Blue</b> | <b>Mean</b>   | 0.72           | 0.85     | 0.83     |
|                       |             | <b>Range</b>  | 0.03           | 0.17     | 0.12     |
|                       |             | <b>AVDEV</b>  | 0.01           | 0.05     | 0.04     |
|                       |             | <b>SD</b>     | 0.01           | 0.06     | 0.05     |
|                       |             | <b>CV (%)</b> | 1.58           | 7.54     | 5.72     |
| <b>Test target 39</b> | <b>Red</b>  | <b>Mean</b>   | 0.76           | 0.91     | 0.82     |
|                       |             | <b>Range</b>  | 0.10           | 0.37     | 0.10     |
|                       |             | <b>AVDEV</b>  | 0.03           | 0.09     | 0.03     |
|                       |             | <b>SD</b>     | 0.04           | 0.13     | 0.04     |
|                       |             | <b>CV (%)</b> | 4.89           | 14.31    | 4.86     |
|                       | <b>Blue</b> | <b>Mean</b>   | 0.73           | 0.89     | 0.82     |
|                       |             | <b>Range</b>  | 0.04           | 0.30     | 0.13     |
|                       |             | <b>AVDEV</b>  | 0.01           | 0.10     | 0.03     |
|                       |             | <b>SD</b>     | 0.02           | 0.11     | 0.04     |
|                       |             | <b>CV(%)</b>  | 2.12           | 12.81    | 4.45     |

s

AVDEV – average deviation, the mean absolute deviation of all measurements of each subject from the mean of the subject's measurements. SD – Standard Deviation; CV - Coefficient of Variation (CV, in %)

**Table S2 – Control participants’ chromatic pupilloperimetry data**

| <b>ID</b> | <b>Target</b> | <b>Red PPC (%)</b> | <b>Red MCV (pixel/sec)</b> | <b>Red LMCV (sec)</b> | <b>Blue PPC (%)</b> | <b>Blue MCV (pixel/sec)</b> | <b>Blue LMCV (sec)</b> |
|-----------|---------------|--------------------|----------------------------|-----------------------|---------------------|-----------------------------|------------------------|
| C#1       | 1             | 22.19              | 39.98                      | 0.66                  | 27.18               | 44.91                       | 0.66                   |
|           | 2             | 18.14              | 36.54                      | 0.66                  | 24.83               | 43.14                       | 0.64                   |
|           | 3             | 14.94              | 29.11                      | 0.66                  | 24.37               | 42.01                       | 0.66                   |
|           | 4             | 17.66              | 32.58                      | 0.64                  | 26.79               | 43.87                       | 0.66                   |
|           | 5             | 12.08              | 25.77                      | 0.66                  | 25                  | 44.55                       | 0.66                   |
|           | 6             | 18.07              | 31.19                      | 0.62                  | 26.14               | 42.33                       | 0.64                   |
|           | 7             | 18.37              | 29.7                       | 0.63                  | 28.13               | 45.41                       | 0.66                   |
|           | 8             | 17.47              | 33.34                      | 0.66                  | 23.16               | 43.01                       | 0.66                   |
|           | 9             | 18.24              | 31.29                      | 0.69                  | 24.92               | 41.61                       | 0.66                   |
|           | 10            | 12.96              | 20.56                      | 0.69                  | 30.07               | 45.88                       | 0.63                   |
|           | 11            | 19.17              | 33.19                      | 0.66                  | 27.44               | 46.38                       | 0.64                   |
|           | 12            | 13.79              | 27.99                      | 0.62                  | 24.57               | 43.88                       | 0.66                   |
|           | 13            | 15.74              | 29.52                      | 0.66                  | 28.36               | 45.66                       | 0.66                   |
|           | 14            | 20.82              | 28.38                      | 0.66                  | 27.1                | 43.9                        | 0.63                   |
|           | 15            | 19.68              | 36.56                      | 0.66                  | 25.66               | 43.66                       | 0.66                   |
|           | 16            | 16.62              | 30.74                      | 0.66                  | 25.86               | 43.6                        | 0.67                   |
|           | 17            | 21.88              | 39.01                      | 0.66                  | 26.53               | 45.13                       | 0.66                   |
|           | 18            | 11.8               | 22.54                      | 0.66                  | 27.19               | 47.17                       | 0.64                   |
|           | 19            | 20.35              | 33.7                       | 0.66                  | 24.41               | 44.71                       | 0.64                   |
|           | 20            | 16.17              | 32.29                      | 0.66                  | 26.89               | 44.6                        | 0.66                   |
|           | 21            | 13.5               | 27.39                      | 0.66                  | 27.49               | 44.9                        | 0.64                   |
|           | 22            | 17.49              | 32.87                      | 0.66                  | 28.11               | 43.91                       | 0.64                   |
|           | 23            | 17.02              | 33.69                      | 0.66                  | 28.52               | 45.82                       | 0.64                   |
|           | 24            | 20.84              | 35.68                      | 0.66                  | 26.85               | 40.53                       | 0.64                   |
|           | 25            | 14.96              | 29.49                      | 0.66                  | 21.97               | 37.42                       | 0.66                   |
|           | 26            | 15.05              | 24.36                      | 0.66                  | 27.16               | 43.68                       | 0.62                   |
|           | 27            | 15.7               | 30.2                       | 0.66                  | 27.34               | 43                          | 0.66                   |
|           | 28            | 11.3               | 20.54                      | 0.66                  | 29.1                | 47.49                       | 0.66                   |
|           | 29            | 17.74              | 31.96                      | 0.66                  | 28.65               | 41.52                       | 0.66                   |
|           | 30            | 19.49              | 35.36                      | 0.66                  | 26.27               | 46.65                       | 0.66                   |
|           | 31            | 17.62              | 28.46                      | 0.66                  | 27.42               | 42.17                       | 0.64                   |
|           | 32            | 20.83              | 36.61                      | 0.66                  | 24.35               | 42.7                        | 0.66                   |
|           | 33            | 22.96              | 35.81                      | 0.67                  | 27.82               | 42.48                       | 0.66                   |
|           | 34            | 19.94              | 28.88                      | 0.66                  | 31.06               | 41.94                       | 0.66                   |
|           | 35            | 18.47              | 33.82                      | 0.66                  | 28.36               | 47.51                       | 0.66                   |
|           | 36            | 11.81              | 21.96                      | 0.66                  | 27.12               | 45.95                       | 0.66                   |

|    |       |       |      |       |       |      |
|----|-------|-------|------|-------|-------|------|
| 37 | ND    | ND    | ND   | 27.37 | 46.34 | 0.62 |
| 38 | 15.65 | 29.57 | 0.66 | 28.9  | 45.6  | 0.63 |
| 39 | 15.51 | 30.78 | 0.66 | 22.38 | 39.52 | 0.63 |
| 40 | ND    | ND    | ND   | 22.96 | 40.85 | 0.66 |
| 41 | 17.09 | 31.1  | 0.66 | 21.97 | 38.68 | 0.66 |
| 42 | 17.67 | 28.18 | 0.66 | 25.05 | 41.26 | 0.66 |
| 43 | 21.44 | 30.2  | 0.66 | 24.31 | 31.36 | 0.66 |
| 44 | 25.28 | 33.14 | 0.66 | 30.34 | 44.79 | 0.66 |
| 45 | 22.4  | 39.73 | 0.66 | 26.31 | 43.09 | 0.66 |
| 46 | 13.2  | 24.08 | 0.69 | 25.67 | 43.44 | 0.66 |
| 47 | 18.79 | 33.13 | 0.67 | 28.2  | 45.38 | 0.66 |
| 48 | 16.46 | 29.14 | 0.69 | 22.37 | 41.33 | 0.66 |
| 49 | 17.68 | 30.67 | 0.67 | 25.89 | 43.54 | 0.66 |
| 50 | 17.38 | 32.25 | 0.69 | 22.11 | 40.38 | 0.66 |
| 51 | 18.69 | 38.34 | 0.66 | 27.7  | 43.66 | 0.66 |
| 52 | 17.45 | 29.68 | 0.66 | 26.56 | 44.59 | 0.66 |
| 53 | 23.35 | 39.9  | 0.66 | 26.89 | 43.34 | 0.66 |
| 54 | 13.68 | 25.67 | 0.66 | 26.77 | 44.02 | 0.66 |
| 55 | 20.05 | 36.59 | 0.66 | 26.54 | 36.46 | 0.66 |
| 56 | 12.27 | 23.14 | 0.69 | 27.3  | 44.21 | 0.66 |
| 57 | 15.15 | 29.84 | 0.66 | 26.45 | 47.61 | 0.66 |
| 58 | 11.57 | 20.86 | 0.69 | 26.31 | 43.03 | 0.66 |
| 59 | 14.55 | 29.84 | 0.66 | 23.18 | 41.38 | 0.66 |
| 60 | 17.97 | 30.66 | 0.64 | 22.39 | 40.55 | 0.66 |
| 61 | 16.64 | 23.56 | 0.66 | 23.34 | 40.66 | 0.62 |
| 62 | 19.72 | 34.61 | 0.67 | 21.68 | 35.67 | 0.66 |
| 63 | 11.35 | 22.99 | 0.67 | 26.96 | 45.34 | 0.66 |
| 64 | 11.65 | 23.23 | 0.67 | 21.75 | 38.95 | 0.66 |
| 65 | 14.94 | 26.59 | 0.67 | 25.29 | 44.29 | 0.62 |
| 66 | 11.58 | 22.14 | 0.66 | 27.78 | 42.18 | 0.66 |
| 67 | 12.13 | 21.66 | 0.66 | 26.86 | 44.23 | 0.66 |
| 68 | 13.14 | 27.19 | 0.66 | 21.97 | 34.85 | 0.66 |
| 69 | 17.68 | 32.1  | 0.64 | 26.96 | 47.03 | 0.66 |
| 70 | 16.06 | 28.96 | 0.66 | 20.19 | 35.29 | 0.66 |
| 71 | 17.68 | 32.1  | 0.64 | 26.96 | 47.03 | 0.66 |
| 72 | 12.61 | 25.61 | 0.66 | 25.43 | 43.46 | 0.66 |
| 73 | 10.8  | 20.6  | 0.66 | 27.07 | 39.38 | 0.66 |
| 74 | 17.68 | 32.1  | 0.64 | 26.96 | 47.03 | 0.66 |
| 75 | 18.36 | 36.86 | 0.66 | 26.3  | 39.03 | 0.67 |
| 76 | 14.63 | 27.07 | 0.66 | 23.14 | 40.59 | 0.66 |

|     |    |       |       |      |       |       |      |
|-----|----|-------|-------|------|-------|-------|------|
| C#2 | 1  | ND    | ND    | ND   | 29.3  | 48.88 | 0.61 |
|     | 2  | 10.24 | 24.98 | 0.66 | 33.48 | 49.69 | 0.64 |
|     | 3  | ND    | ND    | ND   | 33.84 | 49.37 | 0.61 |
|     | 4  | ND    | ND    | ND   | 36.79 | 53.02 | 0.64 |
|     | 5  | ND    | ND    | ND   | 30.24 | 41.01 | 0.64 |
|     | 6  | 13.59 | 33.06 | 0.66 | 34.74 | 52.85 | 0.61 |
|     | 7  | 16.8  | 39.6  | 0.62 | 37.21 | 56.89 | 0.62 |
|     | 8  | 13.73 | 23.18 | 0.67 | 29.46 | 48    | 0.61 |
|     | 9  | 14.46 | 29.91 | 0.64 | 38.78 | 55.88 | 0.63 |
|     | 10 | 19.83 | 34.02 | 0.63 | 38.36 | 56.75 | 0.63 |
|     | 11 | 9.32  | 20.46 | 0.66 | 34.93 | 50.46 | 0.63 |
|     | 12 | 22.05 | 41.62 | 0.63 | 35.24 | 54.66 | 0.63 |
|     | 13 | 8.25  | 21.22 | 0.66 | 32.65 | 53.27 | 0.64 |
|     | 14 | 17.38 | 31.04 | 0.66 | 28.14 | 46.69 | 0.62 |
|     | 15 | ND    | ND    | ND   | 37.79 | 53.5  | 0.59 |
|     | 16 | ND    | ND    | ND   | 34.49 | 50.83 | 0.62 |
|     | 17 | 20.78 | 41.99 | 0.62 | 40.02 | 54.05 | 0.62 |
|     | 18 | 14.59 | 32.22 | 0.62 | 36.3  | 53.92 | 0.59 |
|     | 19 | ND    | ND    | ND   | 25.77 | 43.68 | 0.63 |
|     | 20 | 11.64 | 27.33 | 0.66 | 28.3  | 52.69 | 0.62 |
|     | 21 | 15.03 | 25.86 | 0.62 | 38.53 | 63.81 | 0.62 |
|     | 22 | 18.65 | 32.75 | 0.62 | 31.87 | 46.48 | 0.63 |
|     | 23 | 18.95 | 26.62 | 0.62 | 34.68 | 50.4  | 0.6  |
|     | 24 | 22.2  | 42.59 | 0.66 | 33.95 | 49.52 | 0.61 |
|     | 25 | 24.17 | 45.93 | 0.66 | 39.83 | 54.47 | 0.62 |
|     | 26 | 21.47 | 38.08 | 0.66 | 41.21 | 61.79 | 0.59 |
|     | 27 | 14.76 | 29.13 | 0.64 | 35    | 54.44 | 0.61 |
|     | 28 | 22.41 | 41.62 | 0.63 | 40.39 | 51.9  | 0.62 |
|     | 29 | ND    | ND    | ND   | 34.84 | 51.86 | 0.62 |
|     | 30 | ND    | ND    | ND   | 35.82 | 59.3  | 0.62 |
|     | 31 | ND    | ND    | ND   | 35.46 | 56.01 | 0.62 |
|     | 32 | ND    | ND    | ND   | 30.57 | 38.68 | 0.66 |
|     | 33 | 30.82 | 39.41 | 0.69 | 39.54 | 56.25 | 0.62 |
|     | 34 | 16.85 | 31.62 | 0.62 | 37.2  | 57.23 | 0.63 |
|     | 35 | 19.3  | 34.19 | 0.62 | 40.88 | 58.95 | 0.63 |
|     | 36 | 15.96 | 34.85 | 0.62 | 36.94 | 53.24 | 0.63 |
|     | 37 | 14.68 | 30.18 | 0.64 | 35.73 | 55.63 | 0.62 |
|     | 38 | 18.63 | 34.26 | 0.64 | 37.88 | 49.62 | 0.62 |
|     | 39 | 7.84  | 17.03 | 0.67 | 31.43 | 49.45 | 0.64 |
|     | 40 | ND    | ND    | ND   | 35.39 | 55.08 | 0.63 |
|     | 41 | ND    | ND    | ND   | 38.49 | 57.15 | 0.59 |

|    |       |       |      |       |       |      |
|----|-------|-------|------|-------|-------|------|
| 42 | ND    | ND    | ND   | 34.4  | 52.65 | 0.62 |
| 43 | 25.67 | 38.74 | 0.62 | 40.54 | 54.05 | 0.61 |
| 44 | 26.57 | 33.92 | 0.64 | 39.79 | 58.8  | 0.63 |
| 45 | 22.03 | 28.99 | 0.67 | 37.29 | 57.77 | 0.62 |
| 46 | 16.25 | 27.08 | 0.66 | 33.52 | 44.18 | 0.62 |
| 47 | 13.23 | 27.7  | 0.62 | 35.51 | 55.97 | 0.62 |
| 48 | 21.51 | 31.19 | 0.66 | 32.98 | 54.38 | 0.62 |
| 49 | ND    | ND    | ND   | 32.9  | 52.64 | 0.62 |
| 50 | 6.47  | 8.81  | 1.81 | 34.54 | 53.41 | 0.62 |
| 51 | ND    | ND    | ND   | 32.62 | 52.26 | 0.63 |
| 52 | 10.76 | 16.16 | 0.66 | 37.64 | 57.11 | 0.63 |
| 53 | 12.65 | 13.52 | 0.64 | 38.51 | 56.7  | 0.64 |
| 54 | 18.6  | 22.3  | 0.62 | 37.33 | 56.84 | 0.59 |
| 55 | ND    | ND    | ND   | 36.19 | 56.38 | 0.62 |
| 56 | 15.54 | 27.87 | 0.64 | 34.52 | 52.12 | 0.62 |
| 57 | 20.75 | 32.08 | 0.62 | 33.54 | 56.63 | 0.63 |
| 58 | 12.84 | 24.85 | 0.64 | 31.94 | 50.19 | 0.63 |
| 59 | 16.03 | 31.93 | 0.63 | 32.09 | 49.05 | 0.62 |
| 60 | 6.33  | 14.03 | 0.69 | 31.87 | 57.19 | 0.62 |
| 62 | 23.08 | 30.33 | 0.63 | 37.42 | 55.49 | 0.63 |
| 63 | ND    | ND    | ND   | 31.44 | 50.38 | 0.62 |
| 64 | 18.08 | 29.26 | 0.64 | 33.43 | 49.51 | 0.62 |
| 65 | ND    | ND    | ND   | 32.21 | 49.5  | 0.62 |
| 66 | 16.58 | 23.4  | 0.67 | 32.33 | 46.63 | 0.62 |
| 67 | 12.03 | 27.46 | 0.62 | 28.72 | 48.37 | 0.66 |
| 68 | 14.36 | 17.58 | 0.7  | 35.09 | 56.3  | 0.63 |
| 69 | 12.45 | 24.47 | 0.64 | 25.59 | 45.42 | 0.62 |
| 70 | ND    | ND    | ND   | 31.24 | 53.24 | 0.63 |
| 71 | 12.45 | 24.47 | 0.64 | 35.13 | 55.9  | 0.62 |
| 72 | 13.76 | 22.94 | 0.66 | 27.19 | 40.62 | 0.66 |
| 73 | 14.16 | 15.31 | 0.67 | 34.71 | 55.13 | 0.62 |
| 74 | 12.45 | 24.47 | 0.64 | 35.13 | 55.9  | 0.62 |
| 75 | 12.45 | 23.06 | 0.62 | 28.95 | 49.57 | 0.62 |
| 76 | 18.87 | 26.72 | 0.62 | 32.52 | 54.72 | 0.63 |

|     |    |       |       |      |       |       |      |
|-----|----|-------|-------|------|-------|-------|------|
| C#3 | 1  | 15.36 | 16.02 | 0.72 | 30.89 | 38.85 | 0.62 |
|     | 2  | 17.93 | 14.72 | 0.69 | 33.87 | 41.82 | 0.62 |
|     | 3  | 16.95 | 21.66 | 0.66 | 30.83 | 37.58 | 0.66 |
|     | 4  | 20.63 | 22.87 | 0.69 | 36.01 | 36.36 | 0.61 |
|     | 5  | 16.09 | 23.73 | 0.66 | ND    | ND    | ND   |
|     | 6  | 18.84 | 23.85 | 0.66 | 29.35 | 33.79 | 0.62 |
|     | 7  | 16.06 | 21.22 | 0.69 | 32.29 | 30.78 | 0.66 |
|     | 8  | 21.19 | 29.18 | 0.66 | 32.12 | 37.14 | 0.63 |
|     | 9  | 17.17 | 23.82 | 0.69 | 31.03 | 33.68 | 0.63 |
|     | 10 | 19.72 | 23.87 | 0.69 | 34.17 | 28.42 | 0.5  |
|     | 11 | 15.14 | 21.41 | 0.66 | 33.04 | 37.44 | 0.62 |
|     | 12 | 14.91 | 21.23 | 0.66 | 25.01 | 26.81 | 0.66 |
|     | 13 | 15.57 | 21.67 | 0.69 | 32.04 | 31.56 | 0.62 |
|     | 14 | 22.52 | 27.06 | 0.66 | 28.18 | 36.67 | 0.62 |
|     | 15 | 16.43 | 23.22 | 0.66 | 28.52 | 33.26 | 0.63 |
|     | 16 | 15.39 | 22.65 | 0.66 | 32.21 | 36.78 | 0.62 |
|     | 17 | 21.99 | 32.09 | 0.66 | 33.23 | 37.96 | 0.64 |
|     | 18 | 23.23 | 31.62 | 0.66 | 23.72 | 25.29 | 0.66 |
|     | 19 | 13.19 | 18.2  | 0.69 | 31.25 | 35.6  | 0.63 |
|     | 20 | 16.08 | 21.99 | 0.66 | 31.61 | 36.16 | 0.62 |
|     | 21 | 18.03 | 23.02 | 0.66 | 30.54 | 37.67 | 0.63 |
|     | 22 | 18.34 | 27.55 | 0.66 | 35.65 | 28.98 | 0.66 |
|     | 23 | 22.91 | 33.01 | 0.66 | 33.61 | 36.01 | 0.66 |
|     | 24 | 23.89 | 29.42 | 0.66 | 26.71 | 30.32 | 0.66 |
|     | 25 | 14.61 | 23.22 | 0.66 | 35.7  | 43.19 | 0.66 |
|     | 26 | 28.24 | 33.47 | 0.63 | 34.12 | 39.34 | 0.62 |
|     | 27 | 24.16 | 31.77 | 0.62 | 29.44 | 32.37 | 0.62 |
|     | 28 | 21.74 | 29.08 | 0.66 | 29.4  | 35.05 | 0.63 |
|     | 29 | ND    | ND    | ND   | 33.78 | 33.42 | 0.66 |
|     | 30 | 19.08 | 25.99 | 0.7  | 34.34 | 34.12 | 0.66 |
|     | 31 | 17.42 | 27.29 | 0.66 | 39.14 | 40.6  | 0.66 |
|     | 32 | 21.05 | 30.14 | 0.69 | 31.8  | 30.65 | 0.69 |
|     | 33 | 30.24 | 34.07 | 0.66 | 40.65 | 34.05 | 0.66 |
|     | 34 | 22.79 | 26.99 | 0.63 | 35.59 | 36.63 | 0.66 |
|     | 35 | 21.05 | 28.24 | 0.66 | ND    | ND    | ND   |
|     | 36 | 24.59 | 27.23 | 0.69 | 28.13 | 29.58 | 0.66 |
|     | 37 | 22.46 | 24.67 | 0.66 | 34.03 | 31.7  | 0.62 |
|     | 38 | 24.21 | 31.33 | 0.66 | 25.78 | 21.76 | 0.66 |
|     | 39 | 20.8  | 25.56 | 0.69 | 27.35 | 31.45 | 0.66 |
|     | 40 | 21.78 | 29.15 | 0.69 | 29.81 | 25.38 | 0.66 |
|     | 41 | 23.05 | 30.25 | 0.66 | 27.64 | 26.42 | 0.66 |

|    |       |       |      |       |       |      |
|----|-------|-------|------|-------|-------|------|
| 42 | 24.09 | 30.08 | 0.69 | 36.66 | 41.84 | 0.66 |
| 43 | 27.7  | 28.66 | 0.69 | 34.6  | 34.79 | 0.66 |
| 44 | 31.57 | 35.31 | 0.66 | 36.16 | 39.31 | 0.66 |
| 45 | 27.2  | 27.6  | 0.66 | 32.8  | 34.47 | 0.64 |
| 46 | 19.2  | 20.24 | 0.66 | 29.76 | 37.45 | 0.62 |
| 47 | 24.79 | 30.58 | 0.66 | 32.75 | 35.41 | 0.66 |
| 48 | 27.37 | 33.68 | 0.62 | 33.27 | 35.43 | 0.62 |
| 49 | 22.2  | 30.89 | 0.62 | 23.3  | 19.55 | 0.62 |
| 50 | 17.58 | 23.82 | 0.69 | 31.67 | 36.76 | 0.63 |
| 51 | 20.46 | 25.03 | 0.69 | 30.59 | 37.8  | 0.62 |
| 52 | 21.33 | 32.27 | 0.66 | 32.72 | 34.76 | 0.63 |
| 53 | 22.14 | 26.45 | 0.66 | 32.93 | 26.8  | 0.59 |
| 54 | 27.04 | 31.68 | 0.66 | 33.55 | 32.6  | 0.64 |
| 55 | 24.27 | 26.52 | 0.66 | 31.9  | 37.68 | 0.66 |
| 56 | 24.54 | 32.8  | 0.62 | 31.52 | 29.55 | 0.62 |
| 57 | 25.34 | 29.86 | 0.62 | 36.2  | 42.09 | 0.63 |
| 58 | 27.73 | 27.35 | 0.66 | 28.71 | 33.34 | 0.66 |
| 59 | 22.27 | 26.54 | 0.66 | 30.82 | 33.97 | 0.66 |
| 60 | 18.16 | 24.28 | 0.69 | 34.98 | 41.63 | 0.67 |
| 61 | 21.6  | 27.61 | 0.66 | 33.29 | 39.55 | 0.62 |
| 62 | 23.86 | 27.24 | 0.69 | 32.7  | 39.31 | 0.63 |
| 63 | ND    | ND    | ND   | 34.85 | 42.52 | 0.64 |
| 64 | 25.2  | 31.98 | 0.62 | 33.24 | 35.06 | 0.62 |
| 65 | 23.75 | 26.71 | 0.66 | 33.6  | 30.18 | 0.62 |
| 66 | 21.9  | 29.71 | 0.66 | 34.27 | 39.55 | 0.62 |
| 67 | 21.68 | 29.41 | 0.66 | 31.76 | 36.23 | 0.67 |
| 68 | 19.56 | 27    | 0.66 | 30.07 | 36    | 0.64 |
| 69 | 19.81 | 23.67 | 0.66 | 34.47 | 36.17 | 0.62 |
| 70 | 18.75 | 25.48 | 0.66 | 28.78 | 34.02 | 0.63 |
| 71 | 19.32 | 23.02 | 0.66 | 34.47 | 36.17 | 0.62 |
| 72 | 19.29 | 23.83 | 0.67 | 26.54 | 31.76 | 0.62 |
| 73 | 19.03 | 25.81 | 0.69 | 30.01 | 34.99 | 0.66 |
| 74 | 19.32 | 23.02 | 0.66 | 34.47 | 36.17 | 0.62 |
| 75 | 15.16 | 22.48 | 0.62 | 31.61 | 34.3  | 0.66 |
| 76 | 21.94 | 27.71 | 0.63 | 28.33 | 31.54 | 0.64 |

|     |    |       |       |      |       |       |      |
|-----|----|-------|-------|------|-------|-------|------|
| C#4 | 1  | 1.25  | 3.43  | 0.72 | 7.17  | 17.07 | 0.62 |
|     | 2  | 2.77  | 6.06  | 0.67 | 13.16 | 33.49 | 0.61 |
|     | 3  | 3.33  | 8.94  | 0.66 | 10.51 | 25.83 | 0.64 |
|     | 4  | 2.49  | 6.56  | 0.66 | 16.48 | 38.34 | 0.61 |
|     | 5  | 5.82  | 14.74 | 0.66 | 14.64 | 34.38 | 0.61 |
|     | 6  | 1.99  | 5.06  | 0.72 | 10.89 | 26.04 | 0.62 |
|     | 7  | 2.64  | 6.33  | 0.69 | 17.33 | 40.68 | 0.63 |
|     | 8  | 8.69  | 21.67 | 0.62 | 16.52 | 37.44 | 0.63 |
|     | 9  | 2.05  | 4.58  | 0.69 | 10.06 | 24.39 | 0.62 |
|     | 10 | 1.88  | 4.97  | 0.66 | 21.76 | 44.38 | 0.62 |
|     | 11 | 1.31  | 3.14  | 0.69 | 18.65 | 40.21 | 0.63 |
|     | 12 | 2.19  | 5.78  | 0.69 | 14.42 | 35.18 | 0.62 |
|     | 13 | 3.03  | 7.28  | 0.72 | 18.74 | 40.21 | 0.63 |
|     | 14 | 7.01  | 17.19 | 0.67 | 15.64 | 37.01 | 0.62 |
|     | 15 | 2.04  | 5.25  | 0.69 | 6.27  | 15.88 | 0.61 |
|     | 16 | 13.3  | 28.65 | 0.63 | 16.73 | 38.36 | 0.62 |
|     | 17 | 3.27  | 8.47  | 0.66 | 13.42 | 32.07 | 0.66 |
|     | 18 | 1.52  | 4.13  | 0.67 | 16    | 38.74 | 0.61 |
|     | 19 | 3.68  | 8.73  | 0.69 | 18.84 | 40.8  | 0.64 |
|     | 20 | 3.26  | 8.55  | 0.69 | 17.94 | 39.59 | 0.62 |
|     | 21 | 2.49  | 6.13  | 0.69 | 24.07 | 46.18 | 0.62 |
|     | 22 | 2.46  | 6.13  | 0.75 | 26.59 | 46.51 | 0.62 |
|     | 23 | 6.85  | 15.27 | 0.69 | 16.77 | 36.45 | 0.61 |
|     | 24 | 11.28 | 24.26 | 0.67 | 16.33 | 35.84 | 0.62 |
|     | 25 | 8.67  | 19.35 | 0.66 | 17.22 | 39.57 | 0.62 |
|     | 26 | 9.55  | 22.46 | 0.66 | 11.5  | 29.45 | 0.62 |
|     | 27 | 5.74  | 15.56 | 0.66 | 24.15 | 48.14 | 0.61 |
|     | 28 | 5.72  | 14.77 | 0.66 | 15.6  | 34.74 | 0.62 |
|     | 29 | 2.91  | 6.93  | 0.72 | 18    | 38.83 | 0.63 |
|     | 30 | ND    | ND    | ND   | 15.99 | 37.3  | 0.61 |
|     | 31 | 1.61  | 4.03  | 0.72 | 16.57 | 38.58 | 0.63 |
|     | 32 | 5.72  | 13.49 | 0.7  | 18.99 | 41.26 | 0.63 |
|     | 33 | 8.86  | 17.98 | 0.69 | 22.02 | 42.56 | 0.63 |
|     | 34 | 4.61  | 10.28 | 0.69 | 18.88 | 37.06 | 0.66 |
|     | 35 | 9.07  | 20.69 | 0.67 | 18.67 | 42.85 | 0.61 |
|     | 36 | ND    | ND    | ND   | 19.39 | 42.6  | 0.62 |
|     | 37 | 9.63  | 23.85 | 0.62 | 15.22 | 34.74 | 0.62 |
|     | 38 | 6.07  | 14.87 | 0.66 | 18.77 | 39.9  | 0.62 |
|     | 39 | 5.46  | 13.75 | 0.69 | 16.39 | 40.49 | 0.64 |
|     | 40 | 12.01 | 25.75 | 0.66 | 17.35 | 39.48 | 0.63 |
|     | 41 | 3.54  | 8.59  | 0.69 | 15.61 | 37.17 | 0.64 |



|    |       |       |      |       |       |      |
|----|-------|-------|------|-------|-------|------|
| 42 | 8.66  | 17.55 | 0.73 | 19.17 | 39.05 | 0.63 |
| 43 | 7.11  | 14.67 | 0.7  | 30.81 | 52.8  | 0.64 |
| 44 | 10.41 | 23.02 | 0.66 | 25.48 | 43.45 | 0.63 |
| 45 | 13.71 | 32.15 | 0.62 | 20.33 | 44.87 | 0.61 |
| 46 | 8.27  | 19.81 | 0.67 | 19.34 | 41.61 | 0.63 |
| 47 | 9.42  | 23.49 | 0.66 | 16.72 | 35.27 | 0.61 |
| 48 | 11.96 | 25.77 | 0.66 | 17.24 | 38.17 | 0.63 |
| 49 | 7.64  | 17.59 | 0.66 | 13.99 | 33.42 | 0.62 |
| 50 | 10.94 | 25.89 | 0.64 | 10.98 | 27.08 | 0.62 |
| 51 | 1.64  | 2.45  | 0.78 | 12.84 | 30    | 0.64 |
| 52 | 8.82  | 18.28 | 0.64 | 19.94 | 41.83 | 0.64 |
| 53 | 10.89 | 22.91 | 0.66 | 19.65 | 37.24 | 0.64 |
| 54 | 11.6  | 23.24 | 0.67 | 29.11 | 47.21 | 0.64 |
| 55 | 12.66 | 22.84 | 0.69 | 18.76 | 41.64 | 0.64 |
| 56 | 5.45  | 12.46 | 0.67 | 17.38 | 39.18 | 0.63 |
| 57 | 8.1   | 18.99 | 0.62 | 24.08 | 54.19 | 0.61 |
| 58 | 4.37  | 11.11 | 0.66 | 22.96 | 46.3  | 0.63 |
| 59 | 4.31  | 11.98 | 0.63 | 16.5  | 37.61 | 0.62 |
| 60 | 7.64  | 19.1  | 0.66 | 12.93 | 29.19 | 0.63 |
| 61 | 9.66  | 18.36 | 0.66 | 21    | 46.61 | 0.63 |
| 62 | 14.84 | 27.9  | 0.66 | 19.47 | 42.34 | 0.63 |
| 63 | 12.84 | 23.72 | 0.64 | 16.05 | 34.72 | 0.62 |
| 64 | 9.18  | 21.6  | 0.66 | 17.62 | 37.23 | 0.61 |
| 65 | 12.22 | 25.62 | 0.66 | 18.9  | 40.85 | 0.62 |
| 66 | 2.82  | 7.4   | 0.62 | 18.18 | 40.39 | 0.62 |
| 67 | 6.39  | 15.18 | 0.66 | 13.05 | 27.23 | 0.63 |
| 68 | 2.23  | 7.43  | 0.72 | 15.44 | 35.12 | 0.64 |
| 69 | 3.16  | 8.23  | 0.67 | 16.51 | 36.5  | 0.62 |
| 70 | 5     | 12.89 | 0.67 | 20.58 | 41.53 | 0.62 |
| 71 | 3.16  | 8.23  | 0.67 | 16.51 | 36.5  | 0.62 |
| 72 | 2.75  | 6.22  | 0.66 | 14.72 | 32.83 | 0.62 |
| 73 | 4.39  | 11.29 | 0.66 | 13.51 | 28.51 | 0.64 |
| 74 | 3.16  | 8.23  | 0.67 | 16.51 | 36.5  | 0.62 |
| 75 | 6.89  | 17.05 | 0.63 | 18.95 | 40.52 | 0.64 |
| 76 | 3.86  | 8.95  | 0.73 | 20.98 | 45.47 | 0.62 |

|     |    |       |       |      |       |       |      |
|-----|----|-------|-------|------|-------|-------|------|
| C#5 | 1  | ND    | ND    | ND   | 14.85 | 24.58 | 0.66 |
|     | 2  | 10.43 | 18.33 | 0.7  | 20.49 | 32.46 | 0.66 |
|     | 3  | 3.22  | 6.92  | 0.72 | 15.32 | 26.99 | 0.69 |
|     | 4  | 8.76  | 13.59 | 0.72 | 19.1  | 29.12 | 0.69 |
|     | 5  | 9.84  | 16.9  | 0.72 | 10.59 | 19.21 | 0.69 |
|     | 6  | 5.44  | 11.73 | 0.72 | 17.93 | 29.8  | 0.66 |
|     | 7  | 9.79  | 15.46 | 0.73 | 17.16 | 26.48 | 0.69 |
|     | 8  | 10.79 | 14.81 | 0.67 | 18.63 | 26.57 | 0.66 |
|     | 9  | 9.44  | 17.8  | 0.69 | 15.46 | 28.15 | 0.66 |
|     | 10 | 13.8  | 17.11 | 0.73 | 21.22 | 29.7  | 0.7  |
|     | 11 | 6.92  | 13.45 | 0.69 | 17.97 | 28.42 | 0.66 |
|     | 12 | 6.99  | 14.48 | 0.69 | 14.16 | 23.16 | 0.66 |
|     | 13 | 12.8  | 20.4  | 0.69 | 15.49 | 26.36 | 0.66 |
|     | 14 | 9.07  | 14.97 | 0.7  | 11.88 | 20.43 | 0.66 |
|     | 15 | 10.7  | 15.86 | 0.7  | 15.19 | 24.91 | 0.67 |
|     | 16 | 8.99  | 12.95 | 0.69 | 19.23 | 28.88 | 0.69 |
|     | 17 | 13.31 | 21.18 | 0.69 | 17.89 | 28.63 | 0.66 |
|     | 18 | 5.68  | 11.06 | 0.72 | 12.24 | 21.42 | 0.66 |
|     | 19 | 6.98  | 14.22 | 0.69 | 18.28 | 31.63 | 0.66 |
|     | 20 | 10.39 | 18.23 | 0.7  | 11.9  | 20.75 | 0.69 |
|     | 21 | 6.39  | 12.91 | 0.72 | 17.71 | 24.66 | 0.7  |
|     | 22 | 12.63 | 17.96 | 0.72 | 15.6  | 23.06 | 0.69 |
|     | 23 | 3.45  | 7.81  | 0.7  | 10.89 | 20.99 | 0.69 |
|     | 24 | 7.77  | 12.42 | 0.72 | 14.04 | 22.19 | 0.69 |
|     | 25 | 8.17  | 13.13 | 0.7  | 12.4  | 21.78 | 0.66 |
|     | 26 | 8.02  | 13.72 | 0.69 | 17.7  | 26.23 | 0.66 |
|     | 27 | 6.04  | 12.63 | 0.72 | 23.82 | 31.9  | 0.67 |
|     | 28 | 4.47  | 9.36  | 0.75 | 18.52 | 29.19 | 0.67 |
|     | 29 | 5.24  | 8.7   | 0.72 | 9.35  | 18.16 | 0.66 |
|     | 30 | 7.23  | 12.65 | 0.69 | 14.78 | 22.69 | 0.69 |
|     | 31 | 12.75 | 15.89 | 0.75 | 11.55 | 20.49 | 0.66 |
|     | 32 | 12.52 | 17.21 | 0.7  | 19.89 | 24.73 | 0.69 |
|     | 33 | 14.37 | 22.34 | 0.69 | 10.91 | 19.34 | 0.69 |
|     | 34 | ND    | ND    | ND   | 15.94 | 26.01 | 0.66 |
|     | 35 | 11.64 | 12.25 | 0.75 | 15.8  | 26.2  | 0.69 |
|     | 36 | 3.41  | 7.59  | 0.69 | 11.28 | 20.37 | 0.69 |
|     | 37 | 4.34  | 9.73  | 0.69 | 12.87 | 22.64 | 0.67 |
|     | 38 | 5.29  | 10.85 | 0.73 | 15.07 | 24.35 | 0.66 |
|     | 39 | 15.14 | 20.13 | 0.7  | 17.23 | 29.71 | 0.66 |
|     | 40 | 6.16  | 11.14 | 0.72 | 17.89 | 28.76 | 0.66 |
|     | 41 | 11.66 | 20.25 | 0.69 | 18.51 | 26.44 | 0.66 |

|    |       |       |      |       |       |      |
|----|-------|-------|------|-------|-------|------|
| 42 | 18.45 | 20.2  | 0.72 | 14.72 | 26.45 | 0.66 |
| 43 | 16.9  | 16.73 | 0.75 | 18.17 | 24.75 | 0.69 |
| 44 | 18.75 | 19.05 | 0.72 | 23.12 | 29.11 | 0.69 |
| 45 | 10.66 | 16.46 | 0.72 | 26.44 | 33.2  | 0.69 |
| 46 | 11.86 | 18.22 | 0.69 | 13.28 | 24.42 | 0.66 |
| 47 | 10.9  | 16.47 | 0.69 | 10.1  | 20.97 | 0.69 |
| 48 | 11.21 | 18.51 | 0.69 | 15.19 | 27.72 | 0.66 |
| 49 | 4.55  | 8.6   | 0.73 | 11.97 | 23.78 | 0.66 |
| 50 | 10.66 | 17.31 | 0.69 | 19.21 | 26.83 | 0.69 |
| 51 | 10.76 | 13.8  | 0.7  | 12.54 | 24.13 | 0.66 |
| 52 | 7.2   | 13.85 | 0.69 | 14.16 | 25.59 | 0.67 |
| 53 | 19.72 | 21.53 | 0.75 | 15.76 | 19.57 | 0.69 |
| 54 | 15.5  | 18.72 | 0.72 | 13.51 | 23.27 | 0.67 |
| 55 | 11.23 | 18.74 | 0.69 | 17.02 | 25.86 | 0.69 |
| 56 | 9.37  | 14.89 | 0.69 | 17.03 | 24.94 | 0.67 |
| 57 | 8     | 12.95 | 0.73 | 19.01 | 27.12 | 0.66 |
| 58 | 7.34  | 9.83  | 0.72 | 12.91 | 20.95 | 0.69 |
| 59 | 11.91 | 17.83 | 0.69 | 14.68 | 22.69 | 0.69 |
| 60 | 8.25  | 13.69 | 0.72 | 12.01 | 20.35 | 0.69 |
| 61 | 3.91  | 6.23  | 0.72 | 10.62 | 22.02 | 0.66 |
| 62 | 13.06 | 17.44 | 0.72 | 9.37  | 18.18 | 0.66 |
| 63 | 8.51  | 11.65 | 0.69 | 18.95 | 30.35 | 0.66 |
| 64 | 4.5   | 8.34  | 0.72 | 16.92 | 24.71 | 0.69 |
| 65 | 8.01  | 15.59 | 0.72 | 15.59 | 26.73 | 0.66 |
| 66 | ND    | ND    | ND   | 13.74 | 23.41 | 0.69 |
| 67 | ND    | ND    | ND   | 10.05 | 18.21 | 0.67 |
| 68 | 12.22 | 14.93 | 0.69 | 10.81 | 19.13 | 0.69 |
| 69 | 3.99  | 7.91  | 0.72 | 11.06 | 18.72 | 0.69 |
| 70 | 9.77  | 15.3  | 0.7  | 7.05  | 13.71 | 0.69 |
| 71 | 3.99  | 7.91  | 0.72 | 10.19 | 20.76 | 0.69 |
| 72 | ND    | ND    | ND   | 14.95 | 26.58 | 0.66 |
| 73 | 11.08 | 18.1  | 0.69 | 13.32 | 21.45 | 0.66 |
| 74 | 3.99  | 7.91  | 0.72 | 10.19 | 20.76 | 0.69 |
| 75 | ND    | ND    | ND   | 17.99 | 24.55 | 0.69 |
| 76 | 8.37  | 12.72 | 0.75 | 10.19 | 20.76 | 0.69 |

|     |    |       |       |      |       |       |      |
|-----|----|-------|-------|------|-------|-------|------|
| C#6 | 1  | 3.75  | 10.03 | 0.66 | 15.14 | 33.5  | 0.62 |
|     | 2  | 7.33  | 18.34 | 0.66 | 11.83 | 27.16 | 0.66 |
|     | 3  | 7.84  | 18.36 | 0.66 | 8.41  | 21.18 | 0.64 |
|     | 4  | 6.32  | 16    | 0.66 | 20.53 | 43.16 | 0.62 |
|     | 5  | 0.69  | 2.24  | 0.7  | 8.15  | 19.52 | 0.66 |
|     | 6  | 5.71  | 13.3  | 0.66 | 14.76 | 30.59 | 0.66 |
|     | 7  | 5.19  | 12.66 | 0.7  | 14.39 | 32.71 | 0.66 |
|     | 8  | 6.78  | 15.44 | 0.66 | 12.25 | 28.67 | 0.66 |
|     | 9  | 7.79  | 19.15 | 0.66 | 13.34 | 30.32 | 0.66 |
|     | 10 | 8.83  | 21.11 | 0.66 | 17.52 | 37.25 | 0.66 |
|     | 11 | 4.55  | 11.07 | 0.67 | 12.55 | 28.61 | 0.66 |
|     | 12 | 3.26  | 8.88  | 0.69 | 8.83  | 19.24 | 0.62 |
|     | 13 | 4.72  | 11.35 | 0.66 | 11.3  | 25.16 | 0.66 |
|     | 14 | 8.87  | 21.17 | 0.66 | 15.31 | 34.83 | 0.63 |
|     | 15 | 12.21 | 27.23 | 0.66 | 15.19 | 32.87 | 0.66 |
|     | 16 | 9.81  | 23.95 | 0.66 | 17.97 | 36.92 | 0.66 |
|     | 17 | 5.39  | 14.34 | 0.66 | 10.64 | 25.56 | 0.66 |
|     | 18 | 6.17  | 14.25 | 0.67 | 17.2  | 37.88 | 0.66 |
|     | 19 | 8.3   | 18.41 | 0.66 | 10.28 | 24.31 | 0.66 |
|     | 20 | 6.66  | 17.22 | 0.67 | 14.22 | 31.97 | 0.66 |
|     | 21 | 5.83  | 14.02 | 0.66 | 14.06 | 30.93 | 0.62 |
|     | 22 | 11.8  | 23.66 | 0.67 | 18.2  | 39.28 | 0.66 |
|     | 23 | 13.91 | 30.41 | 0.66 | 15.92 | 35.01 | 0.64 |
|     | 24 | 10.71 | 25.24 | 0.64 | 14.77 | 31.64 | 0.64 |
|     | 25 | 3.59  | 9.42  | 0.66 | 14.49 | 30.56 | 0.66 |
|     | 26 | 9.15  | 21.56 | 0.67 | 18.05 | 39.13 | 0.64 |
|     | 27 | 6.06  | 14.04 | 0.66 | 18.33 | 39.24 | 0.66 |
|     | 28 | 5.25  | 12.41 | 0.66 | 12.3  | 28.42 | 0.66 |
|     | 29 | 6.84  | 17.68 | 0.66 | 16.21 | 34.16 | 0.66 |
|     | 30 | 5.56  | 12.79 | 0.66 | 10.36 | 24.06 | 0.66 |
|     | 31 | 4.79  | 11.53 | 0.67 | 14    | 33.33 | 0.64 |
|     | 32 | 8.9   | 21.1  | 0.66 | 15.22 | 31.64 | 0.66 |
|     | 33 | 12.81 | 26.71 | 0.69 | 11.8  | 26.47 | 0.66 |
|     | 34 | 7.36  | 13.35 | 0.7  | 11.19 | 26.16 | 0.66 |
|     | 35 | 7.55  | 18.54 | 0.66 | 11.11 | 25.82 | 0.66 |
|     | 36 | 7.29  | 17.95 | 0.66 | 16.93 | 33.64 | 0.62 |
|     | 37 | 7.75  | 18.84 | 0.66 | 12.2  | 28.6  | 0.66 |
|     | 38 | 7.8   | 17.31 | 0.66 | 8.14  | 21.44 | 0.66 |
|     | 39 | 10.42 | 24.65 | 0.66 | 10.83 | 26    | 0.66 |
|     | 40 | 5.68  | 13.77 | 0.67 | 15.09 | 33.4  | 0.66 |
|     | 41 | 9.24  | 21.17 | 0.66 | 12.51 | 28.81 | 0.66 |

|    |       |       |      |       |       |      |
|----|-------|-------|------|-------|-------|------|
| 42 | 5.85  | 14.18 | 0.66 | 10.72 | 25.67 | 0.66 |
| 43 | 8.49  | 19.03 | 0.69 | 8.41  | 20.73 | 0.67 |
| 44 | 9.56  | 20.69 | 0.69 | 16.41 | 35.86 | 0.66 |
| 45 | 11.36 | 25.8  | 0.66 | 16.21 | 35.91 | 0.66 |
| 46 | 6.4   | 16.39 | 0.66 | 11.99 | 27.65 | 0.66 |
| 47 | 8.13  | 19.53 | 0.64 | 16.39 | 36.48 | 0.66 |
| 48 | 5.78  | 15.21 | 0.62 | 12.5  | 29.59 | 0.67 |
| 49 | 7.25  | 17.76 | 0.67 | 13.48 | 31.04 | 0.66 |
| 50 | 5.77  | 14.51 | 0.66 | 12.76 | 30.09 | 0.66 |
| 51 | 4.36  | 11.27 | 0.66 | 10.83 | 26.44 | 0.66 |
| 52 | 6.46  | 16.7  | 0.66 | 13.1  | 30.78 | 0.66 |
| 53 | 9.17  | 22.01 | 0.67 | 12.98 | 29.44 | 0.66 |
| 54 | 5.19  | 12.97 | 0.67 | 13.75 | 33.49 | 0.66 |
| 55 | 9.57  | 24.01 | 0.66 | 11.12 | 26.73 | 0.62 |
| 56 | 6.37  | 15.79 | 0.66 | 8.81  | 20.47 | 0.66 |
| 57 | 2.94  | 8.51  | 0.66 | 15.1  | 33.06 | 0.66 |
| 58 | 4.23  | 11.56 | 0.66 | 13.65 | 31.27 | 0.62 |
| 59 | 8.22  | 20.25 | 0.67 | 15.66 | 35.32 | 0.66 |
| 60 | 9.42  | 18.77 | 0.69 | 9.09  | 23.24 | 0.66 |
| 61 | 3.12  | 8.18  | 0.7  | 12.59 | 29.72 | 0.66 |
| 62 | 7.64  | 19.5  | 0.67 | 13.46 | 31.66 | 0.66 |
| 63 | 3.96  | 10.28 | 0.66 | 14.22 | 32.08 | 0.66 |
| 64 | 9.09  | 20.97 | 0.66 | 13.12 | 31.1  | 0.66 |
| 65 | 10.54 | 20.35 | 0.67 | 16.66 | 35.98 | 0.63 |
| 66 | 7.6   | 15.44 | 0.69 | 12.26 | 28.75 | 0.66 |
| 67 | 6.74  | 16.3  | 0.67 | 12.04 | 29.01 | 0.62 |
| 68 | 7.26  | 18.15 | 0.66 | 14.03 | 33.28 | 0.64 |
| 69 | 2.97  | 7.94  | 0.67 | 11.57 | 26.2  | 0.66 |
| 70 | 3.9   | 8.14  | 0.66 | 7.24  | 18.73 | 0.66 |
| 71 | 2.97  | 7.94  | 0.67 | 11.2  | 26.12 | 0.66 |
| 72 | 5.4   | 10.08 | 0.7  | 9.54  | 23.18 | 0.66 |
| 73 | 2.07  | 5.81  | 0.62 | 11.26 | 27.26 | 0.66 |
| 74 | 2.97  | 7.94  | 0.67 | 11.2  | 26.12 | 0.66 |
| 75 | 8.69  | 21.28 | 0.66 | 12.28 | 27.7  | 0.64 |
| 76 | 3.93  | 9.58  | 0.62 | 15    | 33.24 | 0.62 |

|     |    |       |       |      |       |       |      |
|-----|----|-------|-------|------|-------|-------|------|
| C#7 | 1  | 10.85 | 9.21  | 0.67 | 13.45 | 16.96 | 0.69 |
|     | 2  | 9.92  | 11.28 | 0.75 | 15.32 | 18.86 | 0.66 |
|     | 3  | 2.39  | 4.45  | 0.69 | 17.87 | 22.01 | 0.66 |
|     | 4  | 4.11  | 6.15  | 0.69 | 12.56 | 16.66 | 0.69 |
|     | 5  | 3.93  | 6.4   | 0.72 | 9.95  | 13.2  | 0.69 |
|     | 6  | 7.83  | 10.59 | 0.69 | 14.66 | 16.81 | 0.66 |
|     | 7  | 12.14 | 15.96 | 0.67 | 18.02 | 20.87 | 0.69 |
|     | 8  | 9.73  | 14.04 | 0.66 | 15.62 | 18.22 | 0.69 |
|     | 9  | 5.82  | 8.35  | 0.72 | 14.29 | 19.34 | 0.69 |
|     | 10 | ND    | ND    | ND   | 19.12 | 23.18 | 0.66 |
|     | 11 | 3.8   | 5.16  | 0.73 | 16.44 | 20.37 | 0.66 |
|     | 12 | 6.92  | 9.29  | 0.69 | 17.07 | 17    | 0.69 |
|     | 13 | 12.96 | 12.79 | 0.69 | 17.72 | 20.95 | 0.66 |
|     | 14 | 5.79  | 8.37  | 0.75 | 18.81 | 20.25 | 0.66 |
|     | 15 | 9.25  | 12.55 | 0.69 | 17.14 | 22.97 | 0.66 |
|     | 16 | 8.11  | 12.03 | 0.69 | 20.55 | 24.24 | 0.66 |
|     | 17 | 8.37  | 10.35 | 0.67 | 15.88 | 18.14 | 0.69 |
|     | 18 | 6.18  | 8.98  | 0.69 | 17.88 | 23.16 | 0.66 |
|     | 19 | 9.24  | 12.91 | 0.69 | 11.27 | 15.57 | 0.66 |
|     | 20 | 9.11  | 11.43 | 0.69 | 14.9  | 18.56 | 0.66 |
|     | 21 | 9.5   | 12.03 | 0.72 | 17.17 | 20.24 | 0.66 |
|     | 22 | 13.37 | 16.06 | 0.69 | 20.69 | 21.72 | 0.66 |
|     | 23 | 11.71 | 15.06 | 0.66 | 22.15 | 23.25 | 0.66 |
|     | 24 | 7.1   | 7.28  | 0.7  | 18.74 | 22.54 | 0.69 |
|     | 25 | 11.9  | 14.9  | 0.69 | 16.89 | 21.71 | 0.69 |
|     | 26 | 12.98 | 14.35 | 0.67 | 13.89 | 18.87 | 0.66 |
|     | 27 | 11.05 | 12.34 | 0.66 | 18.29 | 20.85 | 0.66 |
|     | 28 | 6.06  | 9.21  | 0.69 | 15.84 | 17.54 | 0.69 |
|     | 29 | 11.52 | 16.31 | 0.69 | 22.19 | 23.5  | 0.66 |
|     | 30 | 8.93  | 12.55 | 0.72 | 17.43 | 20.69 | 0.66 |
|     | 31 | 9.62  | 15.54 | 0.67 | 25.5  | 21.96 | 0.66 |
|     | 32 | 7.38  | 7.16  | 0.72 | 22.95 | 24.83 | 0.66 |
|     | 33 | 16.45 | 19.54 | 0.69 | 25.44 | 19.8  | 0.72 |
|     | 34 | 9.81  | 10.21 | 0.72 | ND    | ND    | ND   |
|     | 35 | 13.9  | 13.07 | 0.66 | 20.98 | 23.93 | 0.66 |
|     | 36 | 7.1   | 7.98  | 0.75 | 19.74 | 24.12 | 0.66 |
|     | 37 | 5.09  | 6.3   | 0.67 | 15.22 | 19    | 0.66 |
|     | 38 | 7.72  | 9.12  | 0.7  | 15.9  | 18.76 | 0.66 |
|     | 39 | 9.37  | 12.69 | 0.66 | 15.66 | 19.66 | 0.69 |
|     | 40 | 8.61  | 11.42 | 0.69 | 18.21 | 17.77 | 0.69 |
|     | 41 | 5.64  | 7.91  | 0.72 | 15.13 | 20.56 | 0.66 |

|    |       |       |      |       |       |      |
|----|-------|-------|------|-------|-------|------|
| 42 | 5.99  | 5.9   | 0.72 | 16.82 | 21.21 | 0.69 |
| 43 | 12.48 | 9.53  | 0.8  | 19.58 | 19.34 | 0.72 |
| 44 | 14.67 | 12.54 | 0.72 | 16.95 | 17.59 | 0.69 |
| 45 | 12.25 | 13.18 | 0.69 | 19.7  | 23.35 | 0.69 |
| 46 | 3.19  | 4.02  | 0.75 | 10.83 | 14.24 | 0.69 |
| 47 | 11.95 | 15.28 | 0.69 | 16.44 | 21.06 | 0.66 |
| 48 | 6.23  | 6.74  | 0.72 | 15.38 | 18.76 | 0.66 |
| 49 | 9.56  | 10.6  | 0.72 | 13.69 | 17.87 | 0.69 |
| 50 | 5.78  | 7.73  | 0.69 | 13.85 | 18.01 | 0.64 |
| 51 | 6.72  | 6.48  | 0.72 | 13.11 | 17.69 | 0.69 |
| 52 | 2.04  | 3.08  | 0.72 | 18.06 | 21.1  | 0.67 |
| 53 | 6.32  | 8.64  | 0.72 | 17.47 | 20.12 | 0.69 |
| 54 | 11.45 | 13.13 | 0.69 | ND    | ND    | ND   |
| 55 | 8.26  | 10.09 | 0.69 | 15.77 | 17.44 | 0.66 |
| 56 | 4.27  | 6.95  | 0.69 | 14.68 | 18.75 | 0.66 |
| 57 | 14.24 | 13.39 | 0.69 | 15.82 | 18.16 | 0.69 |
| 58 | 10.66 | 6.96  | 0.31 | 10.75 | 15.22 | 0.66 |
| 59 | 4.64  | 2.8   | 0.69 | 15.62 | 17.88 | 0.66 |
| 60 | 12.12 | 15.82 | 0.69 | 14.36 | 17.48 | 0.67 |
| 61 | 9.44  | 9.61  | 0.66 | 13.18 | 18.63 | 0.66 |
| 62 | 13.12 | 12.44 | 0.64 | 12.29 | 16.71 | 0.69 |
| 63 | 8.71  | 11.74 | 0.69 | 16.36 | 16.63 | 0.69 |
| 64 | 6.93  | 9.55  | 0.69 | 10.17 | 12.41 | 0.69 |
| 65 | 10.37 | 8.2   | 0.69 | 13.38 | 15.17 | 0.69 |
| 66 | 9.32  | 10.52 | 0.69 | 14.34 | 19.02 | 0.69 |
| 67 | 8.65  | 6.82  | 0.22 | 12.45 | 14.36 | 0.69 |
| 68 | 3.35  | 4.03  | 0.78 | 14.78 | 17.4  | 0.66 |
| 69 | 8.33  | 10.6  | 0.69 | 14.08 | 16.13 | 0.66 |
| 70 | 3.8   | 6.34  | 0.72 | 8.06  | 11.75 | 0.69 |
| 71 | 8.33  | 10.6  | 0.69 | 14.08 | 16.13 | 0.66 |
| 72 | 10.02 | 13.2  | 0.66 | 11.53 | 13.37 | 0.69 |
| 73 | 3.98  | 4.86  | 0.69 | 10.9  | 14.59 | 0.69 |
| 74 | 8.33  | 10.6  | 0.69 | 14.08 | 16.13 | 0.66 |
| 75 | 11.59 | 11.56 | 0.66 | 18.8  | 18.51 | 0.66 |
| 76 | 3.48  | 5.95  | 0.66 | 11.84 | 15.6  | 0.69 |

|     |    |       |       |      |       |       |      |
|-----|----|-------|-------|------|-------|-------|------|
| C#8 | 1  | 14.18 | 26.56 | 0.69 | 23.35 | 35.05 | 0.69 |
|     | 2  | 13.54 | 20.9  | 0.73 | 23    | 31.39 | 0.69 |
|     | 3  | 15.3  | 21.11 | 0.72 | 21.18 | 32.18 | 0.72 |
|     | 4  | 10.62 | 17.73 | 0.72 | 27.53 | 38.48 | 0.72 |
|     | 5  | 7.53  | 15.07 | 0.72 | 14.8  | 25.8  | 0.72 |
|     | 6  | 14.93 | 26.92 | 0.69 | 25.07 | 30.67 | 0.72 |
|     | 7  | 18.13 | 26.01 | 0.72 | 24.6  | 34.61 | 0.72 |
|     | 8  | 20.48 | 31.27 | 0.7  | 27.03 | 33.82 | 0.69 |
|     | 9  | 13.71 | 23.19 | 0.69 | 24.86 | 34.42 | 0.72 |
|     | 10 | 15.19 | 25.49 | 0.69 | 14.42 | 26.46 | 0.72 |
|     | 11 | 8     | 14.46 | 0.69 | 24    | 34.62 | 0.69 |
|     | 12 | 11.85 | 20.31 | 0.7  | 26.06 | 33.3  | 0.69 |
|     | 13 | 18.99 | 30.05 | 0.69 | 26.12 | 34.39 | 0.72 |
|     | 14 | 21.52 | 28.06 | 0.69 | 25.52 | 36.56 | 0.69 |
|     | 15 | 21.98 | 31.46 | 0.72 | 28.43 | 37.07 | 0.69 |
|     | 16 | 17.07 | 26.89 | 0.69 | 26.29 | 33.86 | 0.69 |
|     | 17 | 22.72 | 33.78 | 0.69 | 26.94 | 35.68 | 0.69 |
|     | 18 | 12.78 | 23.08 | 0.7  | 28.76 | 37.4  | 0.69 |
|     | 19 | 11.38 | 23.01 | 0.7  | 21.2  | 31.85 | 0.69 |
|     | 20 | 9.78  | 18.27 | 0.72 | 26.31 | 33.83 | 0.69 |
|     | 21 | 11.6  | 23.4  | 0.7  | 20.15 | 32.2  | 0.69 |
|     | 22 | 14.86 | 26.86 | 0.69 | 25.89 | 33.16 | 0.69 |
|     | 23 | 16.97 | 29.61 | 0.67 | 29.67 | 35.83 | 0.72 |
|     | 24 | 15.75 | 23.3  | 0.72 | 29.72 | 36.53 | 0.69 |
|     | 25 | 22.72 | 30.62 | 0.7  | 27.87 | 36.09 | 0.69 |
|     | 26 | 19.45 | 29.65 | 0.69 | 28.37 | 41.06 | 0.69 |
|     | 27 | 22.65 | 30.69 | 0.69 | 31.69 | 39.54 | 0.69 |
|     | 28 | ND    | ND    | ND   | 28.21 | 37.69 | 0.69 |
|     | 29 | 18.34 | 32.35 | 0.7  | 25.76 | 37.5  | 0.69 |
|     | 30 | 13.69 | 24.32 | 0.69 | 23.62 | 32.16 | 0.72 |
|     | 31 | 13.99 | 24.88 | 0.72 | 24.2  | 29.25 | 0.69 |
|     | 32 | 12.21 | 22.86 | 0.72 | 24.93 | 33.22 | 0.69 |
|     | 33 | 27.86 | 24.41 | 0.72 | 34.71 | 38.2  | 0.72 |
|     | 34 | 24.63 | 30.7  | 0.73 | 34.25 | 35.63 | 0.72 |
|     | 36 | 18.47 | 29.38 | 0.69 | 24.73 | 34.96 | 0.69 |
|     | 37 | 16.33 | 27.04 | 0.69 | 30.76 | 36.19 | 0.69 |
|     | 38 | 16.91 | 24.6  | 0.72 | 26.48 | 37.11 | 0.69 |
|     | 39 | 16.78 | 24.6  | 0.72 | 28.97 | 32.06 | 0.69 |
|     | 40 | 20.08 | 31.19 | 0.69 | 23.66 | 31.61 | 0.72 |
|     | 41 | 18.11 | 29.11 | 0.69 | 26.72 | 34.78 | 0.69 |
|     | 42 | 19.07 | 27.69 | 0.72 | 25.17 | 31.51 | 0.7  |



|    |       |       |      |       |       |      |
|----|-------|-------|------|-------|-------|------|
| 43 | 27.13 | 23.82 | 0.75 | 29.49 | 34.69 | 0.72 |
| 44 | 30.75 | 33.21 | 0.72 | 37.69 | 36.7  | 0.69 |
| 45 | 26.34 | 30.86 | 0.72 | 23.26 | 25.59 | 0.69 |
| 46 | 14.76 | 24.57 | 0.69 | 21.85 | 30.38 | 0.72 |
| 47 | 12.99 | 23.39 | 0.72 | 21.47 | 32.57 | 0.69 |
| 48 | 19.21 | 29.21 | 0.69 | 25.97 | 34.22 | 0.72 |
| 49 | 12.67 | 17.33 | 0.72 | 20.85 | 30.44 | 0.69 |
| 50 | 10.99 | 19.39 | 0.69 | 24.95 | 33.96 | 0.72 |
| 51 | 14.01 | 22.98 | 0.69 | 24.82 | 31.37 | 0.69 |
| 52 | 16.68 | 25.84 | 0.69 | 25.13 | 32.24 | 0.69 |
| 53 | 17.72 | 26.39 | 0.72 | 30.95 | 34.35 | 0.69 |
| 54 | 16.45 | 26.42 | 0.69 | 20.9  | 29.61 | 0.69 |
| 55 | 14.65 | 25.94 | 0.66 | 24.85 | 32.66 | 0.69 |
| 56 | 14.41 | 26.62 | 0.69 | 24.32 | 32.9  | 0.72 |
| 57 | 15.4  | 27.11 | 0.69 | 26.56 | 36.4  | 0.72 |
| 58 | 5.43  | 10.12 | 0.72 | 19.89 | 25.29 | 0.72 |
| 59 | 13.43 | 20.71 | 0.72 | 21.56 | 30.08 | 0.72 |
| 60 | 14.41 | 24.4  | 0.72 | 19.38 | 29.26 | 0.69 |
| 61 | 14.99 | 25.49 | 0.69 | 22.76 | 32.32 | 0.72 |
| 62 | 22.04 | 28.62 | 0.69 | 30.81 | 37.74 | 0.69 |
| 63 | 18.78 | 26.89 | 0.69 | 26.66 | 32.28 | 0.72 |
| 64 | 3.29  | 8.14  | 0.72 | 21.67 | 30.64 | 0.72 |
| 65 | 12.58 | 23.74 | 0.72 | 17.55 | 26.53 | 0.69 |
| 66 | 14.32 | 25.02 | 0.69 | 12.32 | 22.62 | 0.69 |
| 67 | 5.75  | 11.46 | 0.72 | 20.62 | 26.14 | 0.69 |
| 68 | 11.15 | 21.16 | 0.69 | 22.97 | 29.93 | 0.69 |
| 69 | 15.16 | 26.32 | 0.73 | 24.72 | 32.38 | 0.72 |
| 70 | 8.68  | 18.33 | 0.72 | 14.5  | 25.66 | 0.69 |
| 71 | 15.16 | 26.32 | 0.73 | 24.72 | 32.38 | 0.72 |
| 72 | 9.46  | 18.06 | 0.72 | 18.3  | 29.04 | 0.69 |
| 73 | 11.32 | 21.92 | 0.69 | 23.62 | 30.16 | 0.72 |
| 74 | 15.16 | 26.32 | 0.73 | 24.72 | 32.38 | 0.72 |
| 75 | 18.22 | 31.11 | 0.69 | 23.1  | 33.18 | 0.69 |
| 76 | 11.19 | 20.38 | 0.72 | 16.77 | 25.12 | 0.72 |

|     |    |       |       |      |       |       |      |
|-----|----|-------|-------|------|-------|-------|------|
| C#9 | 1  | 19.69 | 34.37 | 0.66 | 23.85 | 46.72 | 0.66 |
|     | 2  | 14.24 | 33.2  | 0.66 | 29.08 | 48.67 | 0.62 |
|     | 3  | 15.53 | 34.24 | 0.66 | 30.63 | 48.32 | 0.66 |
|     | 4  | 17.23 | 38.4  | 0.66 | 31.63 | 49.27 | 0.63 |
|     | 5  | 7.89  | 20.25 | 0.69 | 30.27 | 50.01 | 0.66 |
|     | 6  | 9.78  | 23.64 | 0.66 | 29.52 | 50.14 | 0.63 |
|     | 7  | 11.82 | 26.3  | 0.66 | 28.44 | 49.21 | 0.66 |
|     | 8  | 16.91 | 37.95 | 0.66 | 28.58 | 50.16 | 0.63 |
|     | 9  | 17.99 | 36.2  | 0.66 | 33.59 | 50.48 | 0.66 |
|     | 10 | 16.33 | 35.59 | 0.66 | 32.18 | 40.72 | 0.62 |
|     | 11 | 12    | 29.94 | 0.66 | 29.56 | 52.6  | 0.63 |
|     | 12 | 10.77 | 28.81 | 0.67 | 27.38 | 49.44 | 0.66 |
|     | 13 | 10.66 | 27.02 | 0.66 | 26.13 | 47.2  | 0.63 |
|     | 14 | 12.08 | 29.82 | 0.66 | 24.57 | 43.54 | 0.66 |
|     | 15 | 16.73 | 36.46 | 0.66 | 31.23 | 49.28 | 0.63 |
|     | 16 | 21.96 | 40.39 | 0.66 | 32.73 | 38.97 | 0.64 |
|     | 17 | 19.87 | 42.16 | 0.66 | 31.47 | 54.6  | 0.63 |
|     | 18 | 13.9  | 32.07 | 0.66 | 30.52 | 48.6  | 0.62 |
|     | 19 | 11.72 | 28.64 | 0.66 | 23.12 | 41.22 | 0.66 |
|     | 20 | 13.12 | 31.52 | 0.66 | 23.85 | 43.76 | 0.66 |
|     | 21 | 9.33  | 24.33 | 0.66 | 25.01 | 46.88 | 0.63 |
|     | 22 | 11.76 | 30.1  | 0.66 | 22.91 | 46.28 | 0.62 |
|     | 23 | 27.33 | 45.4  | 0.66 | 28.37 | 43.67 | 0.63 |
|     | 24 | 20.25 | 39.1  | 0.66 | 30.53 | 50.84 | 0.62 |
|     | 25 | 26.56 | 42.77 | 0.63 | 29.13 | 50.06 | 0.66 |
|     | 26 | 19.12 | 37.57 | 0.69 | 28.77 | 49.87 | 0.63 |
|     | 27 | 22.78 | 39.07 | 0.64 | 30    | 50.02 | 0.63 |
|     | 28 | 24.09 | 39.01 | 0.66 | 27.13 | 50.09 | 0.63 |
|     | 29 | 20.25 | 32.79 | 0.66 | 31.74 | 49.35 | 0.66 |
|     | 30 | 9.74  | 25.92 | 0.69 | 25.73 | 47.65 | 0.62 |
|     | 31 | 10.89 | 28.36 | 0.69 | 27.26 | 50.91 | 0.66 |
|     | 32 | 13.48 | 29.36 | 0.69 | 26.7  | 49.14 | 0.66 |
|     | 33 | 22.37 | 37.07 | 0.7  | 36.23 | 47.3  | 0.66 |
|     | 34 | 21.48 | 37.84 | 0.69 | 30.77 | 50.01 | 0.66 |
|     | 35 | 18.39 | 33.84 | 0.66 | 30.15 | 49.14 | 0.63 |
|     | 36 | 18.26 | 40.21 | 0.66 | 27.28 | 51.49 | 0.66 |
|     | 37 | 19.45 | 33.23 | 0.61 | 34.19 | 47.82 | 0.64 |
|     | 38 | 13.98 | 31.99 | 0.66 | 30.55 | 48.51 | 0.66 |
|     | 39 | 14.53 | 35.11 | 0.66 | 29.16 | 50.38 | 0.64 |
|     | 40 | 17.81 | 33.86 | 0.66 | 30.01 | 44.04 | 0.66 |
|     | 41 | 16.29 | 35.73 | 0.66 | 27.16 | 50.97 | 0.62 |

|                                                                                                                                                      |       |       |      |       |       |      |
|------------------------------------------------------------------------------------------------------------------------------------------------------|-------|-------|------|-------|-------|------|
| 42                                                                                                                                                   | 19.96 | 40.18 | 0.66 | 25.72 | 49.7  | 0.63 |
| 43                                                                                                                                                   | 17.66 | 34.7  | 0.69 | 24.42 | 31.72 | 0.66 |
| 44                                                                                                                                                   | 21.26 | 40.91 | 0.69 | 31.02 | 48.85 | 0.66 |
| 45                                                                                                                                                   | 23.61 | 42.07 | 0.66 | 31    | 50.63 | 0.62 |
| 46                                                                                                                                                   | ND    | ND    | ND   | 27.44 | 46.22 | 0.62 |
| 47                                                                                                                                                   | 20.29 | 38.87 | 0.66 | 31.67 | 53.91 | 0.62 |
| 48                                                                                                                                                   | 16.14 | 34.88 | 0.66 | 26.96 | 43.13 | 0.62 |
| 49                                                                                                                                                   | 12.1  | 27.73 | 0.66 | 28.15 | 50.81 | 0.63 |
| 50                                                                                                                                                   | 11.8  | 28.48 | 0.66 | 26.85 | 47.64 | 0.62 |
| 51                                                                                                                                                   | 12.27 | 28.11 | 0.66 | 26.47 | 49.09 | 0.66 |
| 52                                                                                                                                                   | 13.3  | 32.4  | 0.66 | 28.2  | 51.1  | 0.62 |
| 53                                                                                                                                                   | 16.94 | 36.8  | 0.66 | 27.65 | 46.45 | 0.66 |
| 54                                                                                                                                                   | 16.66 | 32.95 | 0.66 | 28.6  | 39.73 | 0.64 |
| 55                                                                                                                                                   | 19.77 | 37.19 | 0.66 | 30.17 | 46.98 | 0.63 |
| 56                                                                                                                                                   | 17.71 | 37.54 | 0.66 | 29.1  | 41.68 | 0.62 |
| 57                                                                                                                                                   | 14.59 | 30.64 | 0.66 | 28.76 | 49.93 | 0.66 |
| 58                                                                                                                                                   | 18.56 | 34.48 | 0.66 | 29.3  | 50.45 | 0.62 |
| 59                                                                                                                                                   | 16.57 | 30.99 | 0.69 | 28.15 | 47.66 | 0.62 |
| 60                                                                                                                                                   | 13.19 | 30.02 | 0.66 | 28.16 | 48.76 | 0.66 |
| 61                                                                                                                                                   | 11.99 | 30.23 | 0.66 | 26.61 | 45.98 | 0.64 |
| 62                                                                                                                                                   | 14.48 | 31.69 | 0.66 | 26.19 | 42.91 | 0.63 |
| 63                                                                                                                                                   | 18.66 | 34.31 | 0.66 | 29.63 | 49.87 | 0.63 |
| 64                                                                                                                                                   | 13.11 | 27.45 | 0.66 | 32.66 | 45.52 | 0.62 |
| 65                                                                                                                                                   | 13.28 | 29.64 | 0.66 | 30.85 | 46.25 | 0.64 |
| 66                                                                                                                                                   | 7.96  | 19.9  | 0.66 | 27.62 | 46.75 | 0.64 |
| 67                                                                                                                                                   | 9.99  | 25.65 | 0.66 | 25.92 | 45.43 | 0.66 |
| 68                                                                                                                                                   | 11.99 | 26.83 | 0.66 | 29.06 | 40.35 | 0.63 |
| 69                                                                                                                                                   | 16.17 | 31    | 0.66 | 27.68 | 40.96 | 0.63 |
| 70                                                                                                                                                   | 8.58  | 21.22 | 0.69 | 25.1  | 47.12 | 0.62 |
| 71                                                                                                                                                   | 16.17 | 31    | 0.66 | 27.68 | 40.96 | 0.63 |
| 72                                                                                                                                                   | 14.99 | 33    | 0.66 | 32.04 | 50.78 | 0.62 |
| 73                                                                                                                                                   | 12.28 | 27.39 | 0.66 | 23.66 | 42.71 | 0.66 |
| 74                                                                                                                                                   | 16.17 | 31    | 0.66 | 27.68 | 40.96 | 0.63 |
| 75                                                                                                                                                   | 12.01 | 28.27 | 0.66 | 23.76 | 39.24 | 0.66 |
| 76                                                                                                                                                   | 10.82 | 24.31 | 0.66 | 27.67 | 46.55 | 0.62 |
| PPC – percentage of pupil contraction; MCV – maximal pupil contraction velocity; LMCV - latency of maximal pupil contraction velocity; sec- seconds; |       |       |      |       |       |      |

**Table S3 – BEST patients’ chromatic pupilloperimetry data**

| <b>ID</b> | <b>Target</b> | <b>Red PPC (%)</b> | <b>Red MCV (Pixel/sec)</b> | <b>Red LMCV (sec)</b> | <b>Blue PPC (%)</b> | <b>Blue MCV (pixel/sec)</b> | <b>Blue LMCV (sec)</b> |
|-----------|---------------|--------------------|----------------------------|-----------------------|---------------------|-----------------------------|------------------------|
| P#1       | 1             | 8.08               | 15.76                      | 0.59                  | 18.12               | 29.27                       | 0.56                   |
|           | 2             | 8.04               | 16.68                      | 0.59                  | 18.09               | 27.21                       | 0.56                   |
|           | 3             | 2.07               | 3.29                       | 0.59                  | 22.14               | 25.12                       | 0.56                   |
|           | 4             | 7.21               | 16.62                      | 0.56                  | 21.84               | 24.6                        | 0.56                   |
|           | 5             | 8.97               | 18.12                      | 0.53                  | 16.59               | 28.56                       | 0.56                   |
|           | 6             | 7.51               | 17.23                      | 0.59                  | ND                  | ND                          | ND                     |
|           | 7             | 7.4                | 15.52                      | 0.59                  | 15.19               | 26.84                       | 0.55                   |
|           | 8             | 3.28               | 7.59                       | 0.63                  | 17.23               | 29.08                       | 0.56                   |
|           | 9             | 7.07               | 15.12                      | 0.56                  | 25.33               | 36.15                       | 0.56                   |
|           | 10            | 10.13              | 17.65                      | 0.56                  | 20.82               | 31.13                       | 0.53                   |
|           | 11            | 7.72               | 18.49                      | 0.56                  | 20.95               | 31.51                       | 0.56                   |
|           | 12            | 4.42               | 11.45                      | 0.59                  | 22.51               | 35.86                       | 0.5                    |
|           | 13            | 13.73              | 28.92                      | 0.53                  | ND                  | ND                          | ND                     |
|           | 14            | 10.64              | 15.9                       | 0.56                  | 16.28               | 30.09                       | 0.55                   |
|           | 15            | 7.25               | 14.77                      | 0.56                  | 24.21               | 33.12                       | 0.56                   |
|           | 16            | ND                 | ND                         | ND                    | 24.86               | 32.86                       | 0.56                   |
|           | 17            | 8.11               | 18.6                       | 0.56                  | 25.07               | 35.17                       | 0.56                   |
|           | 18            | 3.39               | 7.39                       | 0.59                  | 19.81               | 24.17                       | 0.62                   |
|           | 19            | 8.02               | 18.94                      | 0.56                  | 19.44               | 32.1                        | 0.53                   |
|           | 20            | 9.9                | 19.1                       | 0.59                  | 18.93               | 32.13                       | 0.56                   |
|           | 21            | 12.01              | 15.12                      | 0.53                  | 21.35               | 36.43                       | 0.55                   |
|           | 22            | 11.3               | 19.56                      | 0.59                  | 19.19               | 26.71                       | 0.56                   |
|           | 23            | 5.43               | 14.01                      | 0.59                  | 14.67               | 25.24                       | 0.56                   |
|           | 24            | 5.24               | 12.34                      | 0.59                  | 22.82               | 33.54                       | 0.56                   |
|           | 25            | 4.21               | 8.25                       | 0.59                  | 22.06               | 33.57                       | 0.56                   |
|           | 26            | 7.49               | 13.04                      | 0.61                  | 26.29               | 34.5                        | 0.56                   |
|           | 27            | 7.83               | 15.06                      | 0.59                  | 25.8                | 35.13                       | 0.56                   |
|           | 28            | 3.81               | 9.22                       | 0.59                  | 24.23               | 33.21                       | 0.56                   |
|           | 29            | 7.7                | 16.9                       | 0.61                  | 14.42               | 29.95                       | 0.53                   |
|           | 30            | 5.56               | 11.35                      | 0.62                  | ND                  | ND                          | ND                     |
|           | 31            | 4.63               | 10.47                      | 0.59                  | 14.61               | 20.85                       | 0.56                   |
|           | 32            | 7.98               | 12.61                      | 0.61                  | 20.24               | 22.13                       | 0.56                   |
|           | 33            | 11.22              | 16.92                      | 0.62                  | 14.95               | 23.43                       | 0.58                   |
|           | 34            | 8.14               | 12.51                      | 0.64                  | 12.58               | 21.14                       | 0.56                   |
|           | 35            | 4.92               | 11.71                      | 0.59                  | 17.1                | 22.52                       | 0.61                   |
|           | 36            | 4.36               | 8.72                       | 0.62                  | 6.05                | 15.1                        | 0.53                   |

|  |    |       |       |      |       |       |      |
|--|----|-------|-------|------|-------|-------|------|
|  | 37 | 5.62  | 11.05 | 0.58 | 16.76 | 25.26 | 0.58 |
|  | 38 | 4.91  | 11.41 | 0.56 | 18.24 | 25.89 | 0.56 |
|  | 39 | 5.73  | 13.74 | 0.56 | 19.08 | 27.09 | 0.56 |
|  | 40 | 6.41  | 13.26 | 0.56 | 18.2  | 26.02 | 0.53 |
|  | 41 | 6.1   | 12.55 | 0.58 | 22.39 | 30.39 | 0.53 |
|  | 42 | ND    | ND    | ND   | 19.81 | 28.21 | 0.56 |
|  | 43 | 13.99 | 18.93 | 0.56 | 10.77 | 18.19 | 0.59 |
|  | 44 | 8.89  | 14.23 | 0.59 | ND    | ND    | ND   |
|  | 45 | 10.49 | 22.56 | 0.56 | 26.01 | 33.65 | 0.53 |
|  | 46 | 5.77  | 14.03 | 0.59 | 22.2  | 29.19 | 0.66 |
|  | 47 | 9.05  | 8.97  | 0.78 | 26.8  | 30.91 | 0.56 |
|  | 48 | 6.94  | 8.35  | 0.56 | 14.18 | 21.02 | 0.56 |
|  | 49 | 3.89  | 7.89  | 0.59 | 21.26 | 32.68 | 0.56 |
|  | 50 | 3.99  | 8.73  | 0.59 | 19.69 | 27.23 | 0.56 |
|  | 51 | 2.5   | 5.53  | 0.56 | 17.73 | 22.68 | 0.56 |
|  | 52 | 3.26  | 5.41  | 0.53 | 25.18 | 29.4  | 0.56 |
|  | 53 | 7.29  | 14.26 | 0.59 | 17.57 | 26.57 | 0.56 |
|  | 54 | 3.05  | 4.21  | 0.56 | 13.1  | 18.43 | 0.5  |
|  | 55 | 5.81  | 12.42 | 0.56 | 20.44 | 33.39 | 0.56 |
|  | 56 | 6.33  | 13.36 | 0.59 | 20.56 | 31.14 | 0.56 |
|  | 57 | 3.74  | 7.31  | 0.66 | 20.39 | 31.58 | 0.34 |
|  | 58 | 4.3   | 8.43  | 0.53 | 24.21 | 35.12 | 0.56 |
|  | 59 | 2.4   | 5.09  | 0.59 | 22.21 | 26.7  | 0.56 |
|  | 60 | 7.53  | 14.9  | 0.59 | 16.75 | 23.71 | 0.59 |
|  | 61 | 5.15  | 12.53 | 0.58 | 25.38 | 32.86 | 0.56 |
|  | 62 | 6.03  | 13.52 | 0.58 | 16.69 | 27.12 | 0.56 |
|  | 63 | 5.43  | 7.95  | 0.66 | 20.56 | 32.49 | 0.53 |
|  | 64 | 15.68 | 9.01  | 0.59 | 15.81 | 24.72 | 0.53 |
|  | 65 | 3.4   | 7.24  | 0.63 | 19.67 | 26.5  | 0.56 |
|  | 66 | ND    | ND    | ND   | 18.18 | 31.89 | 0.56 |
|  | 67 | ND    | ND    | ND   | 24.65 | 27.07 | 0.53 |
|  | 68 | 5.15  | 8.52  | 0.56 | 20.23 | 22.98 | 0.56 |
|  | 69 | 4.05  | 8.12  | 0.62 | 14.75 | 21.5  | 0.56 |
|  | 70 | 9.05  | 8.67  | 0.59 | ND    | ND    | ND   |
|  | 71 | 9.87  | 12.61 | 0.53 | 22    | 30.78 | 0.53 |
|  | 72 | 9.51  | 12.17 | 0.62 | 13.44 | 21.3  | 0.56 |
|  | 73 | 6.01  | 14.21 | 0.59 | 24.26 | 40.14 | 0.53 |
|  | 74 | 6     | 12.19 | 0.56 | 11.59 | 23.07 | 0.56 |
|  | 75 | 10.37 | 11.56 | 0.56 | 16.32 | 30.02 | 0.59 |
|  | 76 | 3.84  | 7.29  | 1.69 | 15.41 | 30.89 | 0.58 |
|  | 1  | 6.41  | 13.86 | 0.66 | 10.77 | 20.84 | 0.67 |

|     |    |       |       |      |       |       |      |
|-----|----|-------|-------|------|-------|-------|------|
| P#2 | 2  | 9.44  | 18.96 | 0.62 | 17.86 | 29.69 | 0.66 |
|     | 3  | 9.19  | 17.08 | 0.64 | 9.54  | 20.17 | 0.66 |
|     | 4  | 7.38  | 15.14 | 0.66 | 14.15 | 27.36 | 0.66 |
|     | 5  | 2.92  | 6.92  | 0.7  | 9.49  | 19.73 | 0.66 |
|     | 6  | 11.02 | 20.89 | 0.64 | 12.34 | 24.64 | 0.66 |
|     | 7  | 9     | 19.04 | 0.69 | 18.53 | 30.09 | 0.67 |
|     | 8  | 8.97  | 18.67 | 0.63 | 12.26 | 24.36 | 0.66 |
|     | 9  | 7.76  | 16.48 | 0.66 | 13.11 | 23.91 | 0.66 |
|     | 10 | 5.3   | 12.13 | 0.66 | 15.03 | 29    | 0.66 |
|     | 11 | 6.16  | 12.64 | 0.66 | 16.94 | 30.06 | 0.66 |
|     | 12 | 9.33  | 17.64 | 0.66 | 11.09 | 20.41 | 0.66 |
|     | 13 | 7.05  | 15.74 | 0.66 | 16.8  | 28.53 | 0.66 |
|     | 14 | 10.59 | 22.27 | 0.66 | 16.34 | 37.06 | 0.66 |
|     | 15 | 7.62  | 17.09 | 0.66 | 15.59 | 29.69 | 0.64 |
|     | 16 | 9     | 18.18 | 0.64 | 16.9  | 28.36 | 0.66 |
|     | 17 | 9.55  | 19.16 | 0.62 | 14.68 | 26.23 | 0.66 |
|     | 18 | 4.4   | 7.81  | 0.72 | 11.25 | 21.77 | 0.66 |
|     | 19 | 8.73  | 18.34 | 0.64 | 12.75 | 26.37 | 0.66 |
|     | 20 | 8.29  | 17.08 | 0.66 | 11.81 | 22.82 | 0.67 |
|     | 21 | 10.83 | 22.25 | 0.64 | 15.63 | 26.27 | 0.66 |
|     | 22 | 10.03 | 16.51 | 0.64 | 14.17 | 27.38 | 0.67 |
|     | 23 | 11.04 | 21.92 | 0.62 | 18.27 | 30.1  | 0.66 |
|     | 24 | 10.41 | 21.76 | 0.66 | 14.73 | 25.83 | 0.66 |
|     | 25 | 12.43 | 24.33 | 0.66 | 16.13 | 28.81 | 0.66 |
|     | 26 | 9.35  | 17.13 | 0.64 | 14.09 | 27.55 | 0.66 |
|     | 27 | 9.05  | 16.88 | 0.66 | 13.84 | 27.84 | 0.66 |
|     | 28 | 8     | 15.56 | 0.66 | 10.36 | 20.55 | 0.66 |
|     | 29 | 9.03  | 18.23 | 0.64 | 14.89 | 28.2  | 0.66 |
|     | 30 | 7.66  | 16.34 | 0.66 | 13.99 | 27.33 | 0.66 |
|     | 31 | 7.62  | 14.85 | 0.69 | 13.86 | 25.81 | 0.66 |
|     | 32 | 10.52 | 17.96 | 0.67 | 16.75 | 30.16 | 0.66 |
|     | 33 | 13.62 | 24.38 | 0.66 | 21.93 | 32.34 | 0.64 |
|     | 34 | 12.42 | 21.44 | 0.67 | 16.42 | 30.69 | 0.66 |
|     | 35 | 11.92 | 22.27 | 0.66 | 18.61 | 31.7  | 0.67 |
|     | 36 | 10.3  | 18.81 | 0.66 | 17.59 | 30.56 | 0.66 |
|     | 37 | 9.25  | 17.98 | 0.66 | 13.72 | 27.53 | 0.67 |
|     | 38 | 10.43 | 20.47 | 0.66 | 14.11 | 27.59 | 0.66 |
|     | 39 | 10.07 | 21.25 | 0.64 | 15.54 | 27.8  | 0.66 |
|     | 40 | 10.25 | 20.33 | 0.66 | 15.87 | 30.45 | 0.64 |
|     | 41 | 13.37 | 25.99 | 0.64 | 13.3  | 25.61 | 0.64 |
|     | 42 | 8.79  | 18.21 | 0.67 | 15.71 | 26.91 | 0.64 |

|    |       |       |      |       |       |      |
|----|-------|-------|------|-------|-------|------|
| 43 | 11.19 | 21.73 | 0.66 | 15.74 | 29.2  | 0.66 |
| 44 | 14.2  | 25.28 | 0.66 | 19.23 | 30.7  | 0.66 |
| 45 | 10.87 | 20.41 | 0.66 | 18.38 | 34.91 | 0.66 |
| 46 | 9.43  | 19.35 | 0.64 | 11.72 | 23.03 | 0.66 |
| 47 | 10.75 | 20.16 | 0.66 | 19.19 | 29.61 | 0.64 |
| 48 | 15.09 | 28.77 | 0.62 | 13.18 | 25.03 | 0.62 |
| 49 | 6.24  | 13.82 | 0.67 | 12.73 | 22.76 | 0.66 |
| 50 | 8.83  | 17.78 | 0.66 | 14.91 | 27.57 | 0.64 |
| 51 | 11.63 | 21.72 | 0.64 | 13.43 | 27.29 | 0.66 |
| 52 | 10.05 | 20.45 | 0.66 | 13.19 | 25.66 | 0.64 |
| 53 | 16.24 | 28.22 | 0.66 | 14.75 | 28.14 | 0.62 |
| 54 | 14.17 | 25.69 | 0.64 | 19.3  | 32.3  | 0.66 |
| 55 | 10.77 | 21.2  | 0.66 | 16.85 | 29.78 | 0.66 |
| 56 | 11.94 | 21.45 | 0.66 | 11.88 | 22.51 | 0.66 |
| 57 | 8.94  | 17.36 | 0.64 | 16.39 | 28.72 | 0.64 |
| 58 | 10.78 | 19.09 | 0.62 | 11.49 | 20.89 | 0.62 |
| 59 | 6.95  | 14.14 | 0.66 | 14.43 | 24.85 | 0.66 |
| 60 | 11    | 21.52 | 0.66 | 15.7  | 27.79 | 0.66 |
| 61 | 11.23 | 21.64 | 0.69 | 17.2  | 32.56 | 0.66 |
| 62 | 14.73 | 27.78 | 0.64 | 17.87 | 29.08 | 0.66 |
| 63 | 14.1  | 24.6  | 0.63 | 15.86 | 29.81 | 0.66 |
| 64 | 11.92 | 24.43 | 0.63 | 14.95 | 27.8  | 0.62 |
| 65 | 10.71 | 19.4  | 0.66 | 18.24 | 34.38 | 0.62 |
| 66 | 8.54  | 16.52 | 0.66 | 14.91 | 27.05 | 0.62 |
| 67 | 9.63  | 17.67 | 0.66 | 15.13 | 28.3  | 0.67 |
| 68 | 10.78 | 21.8  | 0.64 | 15.19 | 28.91 | 0.67 |
| 69 | 12.06 | 24.41 | 0.66 | 15.79 | 29.43 | 0.66 |
| 70 | 11.01 | 22.5  | 0.67 | 11.77 | 23.88 | 0.62 |
| 71 | 12.06 | 24.41 | 0.66 | 15.79 | 29.43 | 0.66 |
| 72 | 9.46  | 19.32 | 0.66 | 9.49  | 18.12 | 0.67 |
| 73 | 9.73  | 20.26 | 0.67 | 13.2  | 25.96 | 0.66 |
| 74 | 12.06 | 24.41 | 0.66 | 15.79 | 29.43 | 0.66 |
| 75 | 11.14 | 24.03 | 0.62 | 17.34 | 31.31 | 0.66 |
| 76 | 11.25 | 22.84 | 0.66 | 13.53 | 25.72 | 0.63 |

|     |    |       |       |      |       |       |      |
|-----|----|-------|-------|------|-------|-------|------|
| P#3 | 1  | 2.64  | 5.2   | 0.5  | 9.94  | 19.99 | 0.5  |
|     | 2  | 4.42  | 6.89  | 0.56 | 11.68 | 22    | 0.5  |
|     | 3  | 2.79  | 5.21  | 0.53 | 15.98 | 20.71 | 0.5  |
|     | 4  | 1.14  | 6.16  | 2.02 | 17.31 | 33.28 | 0.47 |
|     | 5  | 2.56  | 5.94  | 0.5  | 12.14 | 25.53 | 0.5  |
|     | 6  | ND    | ND    | ND   | 12.12 | 24.2  | 0.5  |
|     | 7  | 4.05  | 10.27 | 0.56 | 13.94 | 25.68 | 0.5  |
|     | 8  | 5.83  | 6.63  | 0.5  | 9.4   | 21.86 | 0.5  |
|     | 9  | 6.11  | 6.37  | 0.59 | 13.07 | 26.28 | 0.47 |
|     | 10 | 6.03  | 10.1  | 1.94 | 9.02  | 21.98 | 0.47 |
|     | 11 | 2.55  | 6.29  | 0.55 | 12.66 | 20.27 | 0.53 |
|     | 12 | 5.07  | 13.29 | 0.69 | 10.65 | 23.32 | 0.5  |
|     | 13 | 5.02  | 10.34 | 0.5  | 13.65 | 25.9  | 0.5  |
|     | 14 | 6.4   | 10.08 | 0.5  | 7.8   | 12.96 | 0.5  |
|     | 15 | 3.65  | 3.72  | 1.22 | 21.47 | 25.86 | 0.5  |
|     | 16 | 0.7   | 2.91  | 0.47 | 12.98 | 23.16 | 0.47 |
|     | 17 | 1.92  | 5.39  | 0.5  | ND    | ND    | ND   |
|     | 18 | 2.4   | 5.1   | 0.56 | 10.59 | 24.13 | 0.5  |
|     | 19 | 2.2   | 5.78  | 0.53 | 8.01  | 19.93 | 0.48 |
|     | 20 | 3.28  | 6.93  | 0.62 | 11.56 | 26.05 | 0.48 |
|     | 21 | 3.4   | 3.86  | 0.67 | 17.21 | 30.16 | 0.53 |
|     | 22 | ND    | ND    | ND   | 15.26 | 22.39 | 0.53 |
|     | 23 | 4.19  | 5.64  | 0.66 | 19.23 | 19.04 | 0.5  |
|     | 24 | 3.63  | 10.05 | 0.5  | 12.25 | 28.15 | 0.5  |
|     | 25 | 2.12  | 4.93  | 0.56 | 11.69 | 26.12 | 0.5  |
|     | 26 | ND    | ND    | ND   | 18.74 | 27.81 | 0.52 |
|     | 27 | 3.09  | 6.74  | 0.5  | 12.68 | 22.15 | 0.5  |
|     | 28 | 2.37  | 6.5   | 0.56 | 18.77 | 30.74 | 0.5  |
|     | 29 | 3.28  | 4.43  | 0.53 | ND    | ND    | ND   |
|     | 30 | ND    | ND    | ND   | 12.77 | 25.2  | 0.5  |
|     | 31 | ND    | ND    | ND   | 19.34 | 25.6  | 0.5  |
|     | 32 | 4.27  | 3.49  | 0.72 | 19.56 | 24.19 | 0.51 |
|     | 33 | 15.83 | 9.34  | 0.59 | 24.47 | 28.7  | 0.5  |
|     | 34 | 3.13  | 4.14  | 0.22 | 15.76 | 27.79 | 0.5  |
|     | 35 | 6.81  | 9.41  | 0.53 | 11.98 | 23.28 | 0.5  |
|     | 36 | 8.07  | 7.28  | 0.59 | 10.4  | 19.56 | 0.5  |
|     | 37 | 7.53  | 11.51 | 0.53 | 13.18 | 25.38 | 0.47 |
|     | 38 | 3.54  | 5.56  | 0.47 | ND    | ND    | ND   |
|     | 39 | ND    | ND    | ND   | 13.36 | 19.28 | 0.5  |
|     | 40 | 3.79  | 9.2   | 0.5  | 12.02 | 26.98 | 0.48 |
|     | 41 | 3.2   | 7.07  | 0.56 | 14.59 | 27.49 | 0.5  |



|    |       |       |      |       |       |      |
|----|-------|-------|------|-------|-------|------|
| 42 | 1.02  | 3.3   | 1.5  | 8.9   | 16.72 | 0.53 |
| 43 | 13.58 | 10.42 | 0.66 | 16.71 | 25.07 | 0.52 |
| 44 | ND    | ND    | ND   | 18.25 | 26.07 | 0.5  |
| 45 | 4.35  | 8.26  | 0.53 | 16    | 23.94 | 0.5  |
| 46 | 2.52  | 5.61  | 0.55 | 18    | 28.74 | 0.5  |
| 47 | 2.66  | 6.52  | 0.53 | 10.79 | 21.07 | 0.47 |
| 48 | 1.91  | 3.77  | 0.53 | 13.86 | 25.11 | 0.53 |
| 49 | 3     | 5.72  | 0.56 | 10.64 | 24    | 0.5  |
| 50 | ND    | ND    | ND   | 16.66 | 21.52 | 0.5  |
| 51 | 2.35  | 6.3   | 0.59 | 10.45 | 18.45 | 0.53 |
| 52 | 5.14  | 8.76  | 0.56 | 10.6  | 21.3  | 0.5  |
| 53 | 3.19  | 4.42  | 0.62 | 14.47 | 21.86 | 0.53 |
| 54 | 3.2   | 4.78  | 0.5  | 18.91 | 30.74 | 0.5  |
| 55 | 5.54  | 8.76  | 0.59 | 13.04 | 22.44 | 0.5  |
| 56 | ND    | ND    | ND   | 12.11 | 27.04 | 0.47 |
| 57 | 3.22  | 6.91  | 0.53 | 9.53  | 19.46 | 0.5  |
| 58 | 3.55  | 10.04 | 0.53 | 9.08  | 15.88 | 0.53 |
| 59 | 1.95  | 7.54  | 1.59 | 12.43 | 27.78 | 0.47 |
| 60 | ND    | ND    | ND   | 13.34 | 23.93 | 0.5  |
| 61 | 5.69  | 9.71  | 0.53 | 9.13  | 15.31 | 0.53 |
| 62 | 3.24  | 3.42  | 0.22 | 13.54 | 21.12 | 0.53 |
| 63 | ND    | ND    | ND   | 10.07 | 21.4  | 0.53 |
| 64 | 4.02  | 3.79  | 0.64 | ND    | ND    | ND   |
| 65 | 3.01  | 8.91  | 2.02 | 8.4   | 19.57 | 0.53 |
| 66 | 3.89  | 11.68 | 0.5  | 12.03 | 23.18 | 0.53 |
| 67 | 2.16  | 3.05  | 0.58 | 10.58 | 22.59 | 0.5  |
| 68 | 3.09  | 5.04  | 0.69 | 12.79 | 26.93 | 0.5  |
| 69 | ND    | ND    | ND   | 11.02 | 22.71 | 0.5  |
| 70 | 2.82  | 7.64  | 0.53 | 11.14 | 22.46 | 0.5  |
| 71 | 1.96  | 4.02  | 0.5  | 16.38 | 26.97 | 0.5  |
| 72 | 1.98  | 5.85  | 0.22 | 12.46 | 23.81 | 0.48 |
| 73 | ND    | ND    | ND   | 8.52  | 19.9  | 0.52 |
| 74 | ND    | ND    | ND   | 11.07 | 20.48 | 0.5  |
| 75 | 2.16  | 4.5   | 0.23 | 10.05 | 20.85 | 0.5  |
| 76 | 6.86  | 7.65  | 0.59 | 10.77 | 21.11 | 0.5  |

|     |    |       |       |      |       |       |      |
|-----|----|-------|-------|------|-------|-------|------|
| P#4 | 1  | 1.56  | 3.78  | 0.72 | 10.3  | 21.95 | 0.66 |
|     | 2  | 3.49  | 9.16  | 0.69 | 12.51 | 27.44 | 0.66 |
|     | 3  | 1.51  | 3.81  | 0.66 | 10.08 | 24.4  | 0.62 |
|     | 4  | 2.22  | 4.45  | 0.66 | 10.17 | 24.8  | 0.62 |
|     | 5  | 3.04  | 6.58  | 0.69 | 4.99  | 11.84 | 0.69 |
|     | 6  | 4.21  | 9.61  | 0.66 | 11.34 | 25.72 | 0.63 |
|     | 7  | 4.27  | 8.58  | 0.72 | 13.81 | 30.28 | 0.62 |
|     | 8  | 3.24  | 8.38  | 0.66 | 10.04 | 23.38 | 0.66 |
|     | 9  | 2.63  | 6.85  | 0.66 | 8.96  | 21.95 | 0.66 |
|     | 10 | 2.42  | 5.7   | 0.69 | 10.79 | 26.25 | 0.63 |
|     | 11 | 2.65  | 5.55  | 0.69 | 7.98  | 17.27 | 0.66 |
|     | 12 | 2.24  | 5.91  | 0.66 | 13.51 | 28.26 | 0.66 |
|     | 13 | 2.89  | 5.48  | 0.69 | 13.14 | 30.18 | 0.66 |
|     | 14 | 6.37  | 15.38 | 0.66 | 14    | 24.1  | 0.66 |
|     | 15 | 1.9   | 3.76  | 0.72 | 8.04  | 19.44 | 0.66 |
|     | 16 | 3.04  | 8.57  | 0.62 | 13.98 | 32.17 | 0.66 |
|     | 17 | 5.2   | 12.29 | 0.66 | 13.97 | 32.77 | 0.63 |
|     | 18 | 1.46  | 3.81  | 0.69 | 13.29 | 30.23 | 0.61 |
|     | 19 | 2.02  | 4.97  | 0.66 | 7.5   | 18.05 | 0.66 |
|     | 20 | 6.01  | 10.65 | 0.66 | 10.22 | 22.31 | 0.66 |
|     | 21 | 2.34  | 4.17  | 0.69 | 11.71 | 27.58 | 0.62 |
|     | 22 | 3.63  | 9.97  | 0.69 | 11.87 | 22.88 | 0.62 |
|     | 23 | 3.43  | 5.89  | 0.77 | 8.21  | 12.73 | 0.69 |
|     | 24 | 2.38  | 4.93  | 0.72 | 20.68 | 27.59 | 0.69 |
|     | 25 | 3.61  | 9.87  | 0.66 | 15.37 | 35.25 | 0.62 |
|     | 26 | 3.54  | 5.91  | 0.69 | 15.59 | 32.98 | 0.62 |
|     | 27 | 5.35  | 11.74 | 0.66 | 13.87 | 32.01 | 0.62 |
|     | 28 | 4.05  | 10.82 | 0.62 | 10.66 | 23.5  | 0.66 |
|     | 29 | 4.56  | 10.78 | 0.69 | 13.69 | 26.4  | 0.62 |
|     | 30 | 3.82  | 6.91  | 0.72 | 7.62  | 17.47 | 0.66 |
|     | 31 | 5.64  | 12.56 | 0.66 | 14.75 | 33.41 | 0.63 |
|     | 32 | 5.94  | 11.44 | 0.69 | 13.09 | 22.22 | 0.66 |
|     | 33 | 14.07 | 22.97 | 0.69 | 24.98 | 22.36 | 0.69 |
|     | 34 | 4.16  | 9.85  | 0.75 | 20.29 | 30.14 | 0.69 |
|     | 35 | 8.78  | 20.14 | 0.66 | 12.06 | 22.5  | 0.66 |
|     | 36 | 5.35  | 14.11 | 0.66 | 10.86 | 19.54 | 0.62 |
|     | 37 | 2.84  | 6.74  | 0.66 | 11.39 | 22.44 | 0.66 |
|     | 38 | 4.4   | 10.08 | 0.66 | 17.48 | 29.27 | 0.62 |
|     | 39 | 2     | 5.67  | 0.69 | 4.12  | 10.95 | 0.66 |
|     | 40 | 2.34  | 5.97  | 0.66 | 6.19  | 15.23 | 0.66 |
|     | 41 | 1.66  | 4.7   | 0.69 | 5.77  | 13.71 | 0.66 |

|    |      |       |      |       |       |      |
|----|------|-------|------|-------|-------|------|
| 42 | 3.9  | 10.07 | 0.69 | 7.07  | 17.63 | 0.66 |
| 43 | 9.99 | 20.69 | 0.66 | 7.21  | 17.09 | 0.66 |
| 44 | 4.83 | 11.2  | 0.66 | 17.54 | 28.34 | 0.66 |
| 45 | 6.68 | 14.98 | 0.66 | 19.16 | 30.65 | 0.66 |
| 46 | 4.98 | 11.87 | 0.67 | 11.81 | 22.82 | 0.66 |
| 47 | 4.02 | 10.28 | 0.66 | 13.81 | 29.35 | 0.64 |
| 48 | 6.2  | 15.41 | 0.66 | 9.72  | 22.71 | 0.66 |
| 49 | 3.27 | 5.11  | 0.66 | 11.83 | 28.34 | 0.62 |
| 50 | 2.95 | 6.89  | 0.66 | 11.23 | 26.87 | 0.62 |
| 51 | 4.73 | 12.43 | 0.66 | 12.85 | 23.86 | 0.66 |
| 52 | 1.58 | 3.99  | 0.66 | 10.83 | 25.28 | 0.63 |
| 53 | 5.58 | 14.49 | 0.66 | 10.77 | 20.87 | 0.66 |
| 54 | 8.1  | 15.67 | 0.66 | 14.11 | 26.67 | 0.63 |
| 55 | 5.79 | 15.5  | 0.62 | 15.66 | 32    | 0.66 |
| 56 | 5.63 | 14.33 | 0.66 | 18.65 | 33.14 | 0.66 |
| 57 | 8.51 | 20.37 | 0.64 | 14.03 | 32.89 | 0.62 |
| 58 | 3.7  | 9.36  | 0.66 | 9.16  | 21.09 | 0.66 |
| 59 | 0.93 | 2.71  | 0.72 | 6.4   | 16.42 | 0.66 |
| 60 | 0.54 | 1.14  | 0.91 | 8.01  | 17.43 | 0.66 |
| 61 | 1.51 | 3.99  | 0.78 | 7.35  | 18.06 | 0.66 |
| 62 | 5.03 | 11.57 | 0.69 | 15.36 | 26.85 | 0.62 |
| 63 | 4.75 | 11.71 | 0.66 | 10.7  | 19.97 | 0.66 |
| 64 | 5.5  | 14.02 | 0.64 | 14.33 | 28.66 | 0.62 |
| 65 | 5.07 | 12.82 | 0.66 | 9.34  | 22.37 | 0.62 |
| 66 | 2.75 | 7.27  | 0.69 | 12.29 | 27.2  | 0.63 |
| 67 | 2.4  | 5.2   | 0.66 | 12.54 | 21.85 | 0.66 |
| 68 | 2.22 | 5.32  | 0.66 | 12.25 | 26.36 | 0.62 |
| 69 | 3.67 | 9.6   | 0.66 | 9.73  | 23.72 | 0.62 |
| 70 | 6.84 | 18.14 | 0.66 | 8.33  | 20.45 | 0.62 |
| 71 | 3.67 | 9.6   | 0.66 | 9.73  | 23.72 | 0.62 |
| 72 | 7.54 | 19.56 | 0.62 | 13.97 | 22.51 | 0.61 |
| 73 | 0.68 | 1.29  | 0.69 | 7.7   | 18.95 | 0.63 |
| 74 | 3.67 | 9.6   | 0.66 | 9.73  | 23.72 | 0.62 |
| 75 | 4.73 | 8.55  | 0.66 | 7.63  | 18.74 | 0.64 |
| 76 | 1.91 | 5.53  | 0.62 | 7.38  | 18.26 | 0.66 |

|     |    |       |       |      |       |       |      |
|-----|----|-------|-------|------|-------|-------|------|
| P#5 | 1  | 5.18  | 8.11  | 0.69 | 19.81 | 29.9  | 0.66 |
|     | 2  | 14.24 | 24.06 | 0.66 | 20.02 | 32.37 | 0.62 |
|     | 3  | 13.39 | 21.88 | 0.67 | 15.69 | 22.87 | 0.63 |
|     | 4  | 16.96 | 26.65 | 0.66 | 25.31 | 37.98 | 0.62 |
|     | 5  | 4.5   | 6.3   | 0.67 | 15.58 | 24.92 | 0.62 |
|     | 6  | 8.21  | 9.67  | 0.72 | 19.07 | 31.9  | 0.63 |
|     | 7  | 17.19 | 27.58 | 0.64 | 8.56  | 12.65 | 0.69 |
|     | 8  | 10.36 | 16.72 | 0.62 | 17.37 | 29.65 | 0.64 |
|     | 9  | 15.9  | 25.85 | 0.64 | 18.91 | 30.87 | 0.64 |
|     | 10 | 17.65 | 27.82 | 0.66 | 21.59 | 34.01 | 0.64 |
|     | 11 | 8.83  | 14.8  | 0.72 | 20.37 | 32.71 | 0.63 |
|     | 12 | 7.94  | 13.24 | 0.66 | 17.08 | 27.27 | 0.63 |
|     | 13 | 16.61 | 25.11 | 0.67 | 17.29 | 31.11 | 0.63 |
|     | 14 | 10.63 | 18.48 | 0.66 | 15.8  | 26.06 | 0.62 |
|     | 15 | 9.83  | 16.84 | 0.64 | 18.14 | 30.03 | 0.62 |
|     | 16 | 4.21  | 6.67  | 0.66 | 21.96 | 33.21 | 0.64 |
|     | 17 | 9.23  | 16.44 | 0.66 | 19.43 | 31.42 | 0.62 |
|     | 18 | 8.37  | 15.4  | 0.66 | 19.32 | 32.81 | 0.66 |
|     | 19 | 13.58 | 20.74 | 0.69 | 23.49 | 32.76 | 0.63 |
|     | 20 | 17.29 | 26.46 | 0.66 | 18.62 | 28.17 | 0.66 |
|     | 21 | 16.5  | 25.56 | 0.62 | 22.12 | 33.29 | 0.63 |
|     | 22 | 19.72 | 29.3  | 0.66 | 20.17 | 32.73 | 0.66 |
|     | 23 | 17.04 | 25.34 | 0.67 | 22.08 | 34.57 | 0.62 |
|     | 24 | 9.74  | 16.09 | 0.67 | 21.03 | 31.08 | 0.62 |
|     | 25 | 11.26 | 17.66 | 0.67 | 21.86 | 33.59 | 0.62 |
|     | 26 | 4.21  | 7.49  | 0.66 | 15.51 | 22.8  | 0.62 |
|     | 27 | 8.91  | 15.36 | 0.64 | 20.32 | 31.5  | 0.64 |
|     | 28 | 6.98  | 11.52 | 0.66 | 18    | 30.1  | 0.62 |
|     | 29 | 15.18 | 25.68 | 0.66 | 19.95 | 31.04 | 0.61 |
|     | 30 | 15.4  | 25.22 | 0.66 | 19.19 | 31.53 | 0.62 |
|     | 31 | 11.86 | 19.56 | 0.69 | 19.03 | 31.16 | 0.62 |
|     | 32 | 17.93 | 26.99 | 0.66 | 21.4  | 32.17 | 0.62 |
|     | 33 | 20.24 | 30.42 | 0.66 | 23.09 | 36.94 | 0.62 |
|     | 34 | 8.4   | 14.04 | 0.66 | 20.62 | 32.55 | 0.63 |
|     | 35 | 13.58 | 21.5  | 0.66 | 22.88 | 34.69 | 0.62 |
|     | 36 | 10.86 | 16.88 | 0.63 | 19.21 | 29.98 | 0.62 |
|     | 37 | 10.02 | 17.26 | 0.66 | 23.3  | 34.25 | 0.62 |
|     | 38 | 3.15  | 4.43  | 0.69 | 22.52 | 36    | 0.61 |
|     | 39 | 10.66 | 14.09 | 0.66 | 18.45 | 30.74 | 0.62 |
|     | 40 | 13.62 | 21.69 | 0.66 | 20.98 | 32.86 | 0.63 |
|     | 41 | 12.27 | 20.25 | 0.66 | 18.01 | 28.61 | 0.66 |

|    |       |       |      |       |       |      |
|----|-------|-------|------|-------|-------|------|
| 42 | 13.19 | 21.62 | 0.66 | 21.27 | 35.08 | 0.62 |
| 43 | 15.42 | 22.4  | 0.67 | 18.61 | 28.98 | 0.63 |
| 44 | 16.68 | 25.08 | 0.66 | 17.65 | 28.19 | 0.59 |
| 45 | 10.87 | 14.24 | 0.66 | 19.92 | 28.91 | 0.62 |
| 46 | 10.79 | 11.9  | 0.67 | 23.24 | 38.67 | 0.63 |
| 47 | 5.8   | 9.64  | 0.66 | 22.71 | 33.76 | 0.63 |
| 48 | 11.52 | 19.12 | 0.66 | 21.09 | 33.85 | 0.63 |
| 49 | 5.05  | 7.9   | 0.67 | 18.52 | 30.07 | 0.64 |
| 50 | 9.02  | 15.43 | 0.66 | 19.87 | 31.3  | 0.63 |
| 51 | 4.85  | 8.84  | 0.7  | 18.46 | 29.48 | 0.62 |
| 52 | 5.29  | 9.39  | 0.67 | 20.75 | 31.8  | 0.63 |
| 53 | 13.14 | 22.72 | 0.66 | 20.69 | 33.33 | 0.63 |
| 54 | 9.33  | 15.99 | 0.62 | 18.58 | 27.75 | 0.63 |
| 55 | ND    | ND    | ND   | 17.98 | 28.77 | 0.63 |
| 56 | 5.3   | 6.92  | 0.72 | 24.38 | 37.66 | 0.59 |
| 57 | 15.69 | 19.84 | 0.63 | 21.31 | 35.57 | 0.62 |
| 58 | 17.72 | 25.12 | 0.62 | 18.55 | 27.48 | 0.66 |
| 59 | 10.07 | 12.47 | 0.69 | 17.91 | 27.76 | 0.62 |
| 60 | 3.41  | 6.49  | 0.69 | 23.32 | 35.97 | 0.63 |
| 61 | 8.91  | 14.04 | 0.66 | 21.52 | 33.52 | 0.62 |
| 62 | 9.15  | 15.64 | 0.63 | 18.95 | 28.71 | 0.62 |
| 63 | 6.54  | 10.8  | 0.62 | 16.29 | 26.18 | 0.62 |
| 64 | 7.53  | 11.99 | 0.69 | 19.73 | 30.83 | 0.61 |
| 65 | 9.13  | 13.29 | 0.67 | 20.49 | 32.32 | 0.58 |
| 66 | 13.71 | 23.22 | 0.66 | 17.89 | 28.25 | 0.64 |
| 67 | 5.39  | 8.16  | 0.7  | 22.39 | 32.85 | 0.62 |
| 68 | 8.19  | 13.78 | 0.66 | 20.82 | 32.76 | 0.63 |
| 69 | 16.86 | 29.37 | 0.62 | 15.3  | 25.31 | 0.62 |
| 70 | 15.71 | 24    | 0.62 | 20.34 | 30.49 | 0.62 |
| 71 | 9.07  | 14.13 | 0.66 | 15.3  | 25.31 | 0.62 |
| 72 | 10.22 | 16.19 | 0.67 | 19.74 | 31.58 | 0.62 |
| 73 | 9.96  | 12.79 | 0.66 | 17.4  | 23.89 | 0.63 |
| 74 | 9.07  | 14.13 | 0.66 | 15.3  | 25.31 | 0.62 |
| 75 | 8.44  | 12.49 | 0.66 | 14.62 | 24.95 | 0.64 |
| 76 | 9.01  | 15.23 | 0.66 | 19.35 | 33.07 | 0.63 |

|     |    |       |       |      |       |       |      |
|-----|----|-------|-------|------|-------|-------|------|
| P#6 | 1  | 7.56  | 12.56 | 0.56 | 23.09 | 39.09 | 0.5  |
|     | 2  | 8.47  | 18.23 | 0.53 | 9.08  | 18.13 | 0.53 |
|     | 3  | 5.93  | 10.4  | 0.59 | 19.88 | 37.83 | 0.5  |
|     | 4  | 6.27  | 13.29 | 0.53 | 33.77 | 47.84 | 0.5  |
|     | 5  | 8.88  | 19.69 | 0.53 | 33.39 | 39.65 | 0.5  |
|     | 6  | 11.74 | 18.52 | 0.53 | 32.63 | 46.79 | 0.5  |
|     | 7  | 12.31 | 18.16 | 0.53 | 17.72 | 31.7  | 0.47 |
|     | 8  | 7.66  | 16.89 | 0.5  | 26.82 | 44.75 | 0.5  |
|     | 9  | 14.54 | 29.54 | 0.5  | 28.12 | 44.86 | 0.5  |
|     | 10 | 9.57  | 19.7  | 0.5  | 31.31 | 39.57 | 0.5  |
|     | 11 | 7.41  | 15.87 | 0.53 | 22.31 | 41.03 | 0.5  |
|     | 12 | 5.7   | 11.52 | 0.59 | 24.33 | 40.43 | 0.5  |
|     | 13 | 12.44 | 22.93 | 0.53 | 30.1  | 39.89 | 0.55 |
|     | 14 | 6.57  | 14.21 | 0.56 | 12.44 | 25.62 | 0.5  |
|     | 15 | 15.89 | 29.12 | 0.52 | 23.16 | 38.77 | 0.5  |
|     | 16 | 9.52  | 18.24 | 0.52 | 30.32 | 53    | 0.47 |
|     | 17 | 18.84 | 24.83 | 0.52 | 32.78 | 44.92 | 0.53 |
|     | 18 | 13.85 | 27.3  | 0.52 | 28.69 | 43.19 | 0.5  |
|     | 19 | 10.93 | 22.87 | 0.5  | 24.35 | 41.48 | 0.5  |
|     | 20 | 8.71  | 16.66 | 0.59 | 25.75 | 37.51 | 0.55 |
|     | 21 | 9.01  | 17.94 | 0.52 | 30.96 | 42.5  | 0.5  |
|     | 22 | 14.44 | 28.8  | 0.5  | 30    | 37.41 | 0.53 |
|     | 23 | 18.14 | 16.9  | 0.53 | 14.31 | 26.3  | 0.5  |
|     | 24 | 12.36 | 21.41 | 0.53 | 33.85 | 44.79 | 0.5  |
|     | 25 | 12.4  | 25.38 | 0.53 | 30.2  | 40.94 | 0.5  |
|     | 26 | 15.18 | 28.63 | 0.5  | 27.26 | 44.34 | 0.5  |
|     | 27 | 12.61 | 15.62 | 0.53 | 27.01 | 42.84 | 0.5  |
|     | 28 | 13.24 | 24.48 | 0.5  | 28.88 | 48.7  | 0.47 |
|     | 29 | 8.06  | 16.72 | 0.53 | 13.14 | 16.39 | 0.53 |
|     | 30 | 6.74  | 6.55  | 0.81 | 14.92 | 31.14 | 0.5  |
|     | 31 | 10.21 | 20.26 | 0.53 | 14.1  | 22.68 | 0.53 |
|     | 32 | 9.15  | 20.12 | 0.5  | 27.34 | 34.03 | 0.5  |
|     | 33 | 14.77 | 21.74 | 0.53 | 23.21 | 28.88 | 0.53 |
|     | 34 | 1.48  | 3.34  | 0.72 | 0.92  | 2.74  | 1.69 |
|     | 35 | 26.97 | 29.17 | 0.5  | 0     | 0     | 0    |
|     | 36 | 11.9  | 21.38 | 0.5  | 16.95 | 30.64 | 0.5  |
|     | 37 | 9.99  | 19.19 | 0.5  | 17.92 | 30.43 | 0.48 |
|     | 38 | 16.84 | 21.13 | 0.5  | 20.57 | 32.79 | 0.52 |
|     | 39 | 14.48 | 25.25 | 0.53 | 25.88 | 45.63 | 0.5  |
|     | 40 | ND    | ND    | ND   | 27.15 | 44.24 | 0.5  |
|     | 41 | 12.55 | 22.52 | 0.53 | 27.58 | 44.24 | 0.5  |

|    |       |       |      |       |       |      |
|----|-------|-------|------|-------|-------|------|
| 42 | ND    | ND    | ND   | 28.85 | 43.5  | 0.5  |
| 43 | 9.41  | 18.09 | 0.53 | 23.52 | 28.16 | 0.5  |
| 44 | 12.17 | 24.04 | 0.59 | ND    | ND    | ND   |
| 45 | 10.36 | 21.95 | 0.59 | 40.82 | 40.73 | 0.56 |
| 46 | 22.1  | 23.57 | 0.53 | 34.48 | 45.79 | 0.47 |
| 47 | 12.6  | 23.52 | 0.5  | 27.88 | 43.24 | 0.53 |
| 48 | 18.12 | 18.55 | 0.53 | 30.94 | 47.29 | 0.5  |
| 49 | 12.8  | 22.42 | 0.53 | 34.19 | 45.48 | 0.5  |
| 50 | 13.45 | 28.92 | 0.5  | 23.52 | 34.5  | 0.5  |
| 51 | 7.48  | 16.17 | 0.56 | ND    | ND    | ND   |
| 52 | 6.7   | 9.63  | 0.63 | 34.39 | 46.14 | 0.5  |
| 53 | ND    | ND    | ND   | 12.66 | 27.69 | 0.5  |
| 54 | ND    | ND    | ND   | 27.11 | 40.2  | 0.5  |
| 55 | 11.42 | 21.05 | 0.59 | ND    | ND    | ND   |
| 56 | 22.65 | 27.56 | 0.56 | 36.3  | 49.25 | 0.53 |
| 57 | 11.84 | 22.55 | 0.55 | 25.99 | 45.29 | 0.5  |
| 58 | 23.94 | 32.35 | 0.5  | 27.8  | 40.52 | 0.5  |
| 59 | 6.99  | 14.87 | 0.56 | 28.24 | 43.94 | 0.5  |
| 60 | 7.77  | 14.01 | 0.53 | 32.32 | 35.64 | 0.47 |
| 62 | 13.45 | 19.37 | 0.56 | 15.93 | 25.15 | 0.5  |
| 63 | 18.56 | 26.59 | 0.53 | 32.74 | 42.66 | 0.48 |
| 64 | 13.64 | 23    | 0.56 | 33.93 | 48.98 | 0.5  |
| 65 | 11.44 | 20.3  | 0.5  | 34.57 | 47.72 | 0.5  |
| 66 | 9.99  | 14.1  | 0.53 | 22.04 | 30.4  | 0.5  |
| 67 | 17.66 | 21.22 | 0.56 | 27.8  | 40.53 | 0.5  |
| 68 | 15.35 | 24.87 | 0.53 | 25.39 | 39.57 | 0.53 |
| 69 | 3.83  | 8.2   | 0.62 | 30.62 | 46.9  | 0.53 |
| 71 | 3.83  | 8.2   | 0.62 | 30.62 | 46.9  | 0.53 |
| 72 | 10.82 | 17.45 | 0.5  | 30.65 | 47.89 | 0.5  |
| 73 | 19.85 | 22.74 | 0.53 | 32.89 | 43.37 | 0.52 |
| 74 | 3.83  | 8.2   | 0.62 | 30.62 | 46.9  | 0.53 |
| 75 | 14.44 | 19.75 | 0.52 | 34.02 | 43.34 | 0.5  |
| 76 | 10.22 | 18.69 | 0.53 | 38.88 | 45.61 | 0.53 |

|     |    |       |       |      |       |       |      |
|-----|----|-------|-------|------|-------|-------|------|
| P#7 | 1  | 11.57 | 20    | 0.7  | 19.82 | 34.54 | 0.66 |
|     | 2  | 14.05 | 29.53 | 0.69 | 25.15 | 40.48 | 0.66 |
|     | 3  | 4.31  | 10.8  | 0.72 | 18.6  | 35.23 | 0.66 |
|     | 4  | 4.51  | 11.38 | 0.69 | 26.84 | 37.91 | 0.66 |
|     | 5  | 11.22 | 17.7  | 0.66 | 19.55 | 33.99 | 0.66 |
|     | 6  | 12.89 | 23.06 | 0.69 | 22.02 | 35.15 | 0.64 |
|     | 7  | 14.09 | 25.21 | 0.66 | 22    | 39.43 | 0.66 |
|     | 8  | 6.9   | 13.22 | 0.69 | 23.45 | 42.68 | 0.66 |
|     | 9  | 13.73 | 26.29 | 0.69 | 22.88 | 41.48 | 0.66 |
|     | 10 | 9.96  | 17.72 | 0.69 | 19.85 | 37.77 | 0.66 |
|     | 11 | 15.72 | 23    | 0.67 | 31.15 | 49.96 | 0.66 |
|     | 12 | 15.03 | 24.09 | 0.66 | 23.8  | 41.5  | 0.66 |
|     | 13 | 13.57 | 24.39 | 0.66 | 24.31 | 43.83 | 0.66 |
|     | 14 | 11.14 | 25.08 | 0.66 | 24.72 | 41.58 | 0.66 |
|     | 15 | 12.85 | 27.71 | 0.69 | 30.96 | 44.99 | 0.64 |
|     | 16 | 11.9  | 21.5  | 0.69 | 29.42 | 39.56 | 0.66 |
|     | 17 | 7.09  | 15.57 | 0.66 | 26.19 | 46.37 | 0.66 |
|     | 18 | 3.64  | 9.23  | 0.69 | 27.71 | 40.65 | 0.66 |
|     | 19 | 20.1  | 32.58 | 0.69 | 24.67 | 37.37 | 0.66 |
|     | 20 | 10.36 | 20    | 0.69 | 26.64 | 43.84 | 0.66 |
|     | 21 | 9.31  | 20.36 | 0.66 | 23.2  | 40.94 | 0.66 |
|     | 22 | 6.44  | 14.94 | 0.69 | 27.93 | 44.08 | 0.66 |
|     | 23 | 17.83 | 33.01 | 0.66 | 23.2  | 39.01 | 0.66 |
|     | 24 | 12.1  | 26.61 | 0.69 | 25.39 | 42.8  | 0.66 |
|     | 25 | 10.25 | 21.72 | 0.69 | 27.36 | 41.86 | 0.66 |
|     | 26 | 7.84  | 14.6  | 0.69 | 25.17 | 39.78 | 0.66 |
|     | 27 | 7.63  | 18.53 | 0.66 | 22.63 | 41.5  | 0.66 |
|     | 28 | 10.73 | 22.59 | 0.66 | 22.19 | 40.7  | 0.64 |
|     | 29 | 5.17  | 12.63 | 0.69 | ND    | ND    | ND   |
|     | 30 | 12.37 | 25.31 | 0.66 | 19.66 | 36.34 | 0.66 |
|     | 31 | 13.66 | 27.93 | 0.69 | 26.84 | 42.43 | 0.66 |
|     | 32 | 17.3  | 29.63 | 0.69 | 29.49 | 44.27 | 0.66 |
|     | 33 | 14.06 | 25.29 | 0.67 | 36.1  | 43.87 | 0.69 |
|     | 34 | 16.67 | 33.92 | 0.69 | 32.87 | 42.17 | 0.66 |
|     | 35 | 14.33 | 25.92 | 0.69 | 28.95 | 45.46 | 0.66 |
|     | 36 | 12.81 | 27.12 | 0.66 | 28.4  | 39.61 | 0.66 |
|     | 37 | 16.61 | 25.11 | 0.66 | 25.96 | 40.51 | 0.66 |
|     | 38 | 9.15  | 21.26 | 0.66 | 26.57 | 41.53 | 0.62 |
|     | 39 | 11.88 | 25.61 | 0.66 | 18.13 | 33.49 | 0.67 |
|     | 40 | 7.77  | 17.47 | 0.66 | 23.09 | 42.33 | 0.66 |
|     | 41 | 15.7  | 29.42 | 0.69 | 22.43 | 41.43 | 0.66 |



|    |       |       |      |       |       |      |
|----|-------|-------|------|-------|-------|------|
| 42 | 12.42 | 26.7  | 0.69 | 27.9  | 45.12 | 0.66 |
| 43 | 17.23 | 29.59 | 0.69 | 26.9  | 38.84 | 0.66 |
| 44 | 7.41  | 17.78 | 0.69 | 34.08 | 44.61 | 0.64 |
| 45 | 16.32 | 31.43 | 0.66 | 25.26 | 42.28 | 0.66 |
| 46 | 3.84  | 9.16  | 0.66 | 21.79 | 40.7  | 0.66 |
| 47 | 14.85 | 28.72 | 0.66 | 22.96 | 40.04 | 0.69 |
| 48 | 8.85  | 17.44 | 0.66 | 25.92 | 38.78 | 0.66 |
| 49 | 9.05  | 20.99 | 0.69 | 24.65 | 43.43 | 0.66 |
| 50 | 13.24 | 28.9  | 0.69 | 21.83 | 37.8  | 0.66 |
| 51 | 15.52 | 28.19 | 0.66 | 26.21 | 43.89 | 0.64 |
| 52 | 8.61  | 17.11 | 0.69 | 25.61 | 38.4  | 0.67 |
| 53 | 13.79 | 27.53 | 0.69 | 36.81 | 49.27 | 0.66 |
| 54 | 18.54 | 32.31 | 0.66 | 28.78 | 43.62 | 0.66 |
| 55 | 12.02 | 25.6  | 0.66 | 27.04 | 43.11 | 0.66 |
| 56 | 13.1  | 26.33 | 0.66 | 28.94 | 43.49 | 0.63 |
| 57 | 13.11 | 23.83 | 0.69 | 25.19 | 40.99 | 0.66 |
| 58 | 4.05  | 9.64  | 0.72 | 26.91 | 39.21 | 0.66 |
| 59 | 7.65  | 15.31 | 0.69 | 22.01 | 36.52 | 0.66 |
| 60 | 8.5   | 17.41 | 0.69 | 14.96 | 31.12 | 0.67 |
| 61 | 11.26 | 20.93 | 0.72 | 21.57 | 36.09 | 0.67 |
| 62 | 13.46 | 26.55 | 0.66 | ND    | ND    | ND   |
| 63 | 12.19 | 24.43 | 0.66 | 26.36 | 36.42 | 0.69 |
| 64 | 15.04 | 27.12 | 0.69 | 29.61 | 39.83 | 0.66 |
| 65 | 13.13 | 24.27 | 0.67 | 27.96 | 40.65 | 0.62 |
| 66 | 17.52 | 31.46 | 0.66 | 20.77 | 38.72 | 0.66 |
| 67 | 7.75  | 16.58 | 0.72 | 31.57 | 44.24 | 0.66 |
| 68 | 7.45  | 18.02 | 0.69 | 18.49 | 35.29 | 0.66 |
| 69 | 13.45 | 23.9  | 0.64 | 29.96 | 41.48 | 0.66 |
| 70 | 9.8   | 23.24 | 0.66 | 18.72 | 35.98 | 0.66 |
| 71 | 13.45 | 23.9  | 0.64 | 29.96 | 41.48 | 0.66 |
| 72 | 11.33 | 20.34 | 0.66 | 19.7  | 32.34 | 0.66 |
| 73 | 7.99  | 16.36 | 0.69 | 19.46 | 35.82 | 0.66 |
| 74 | 13.45 | 23.9  | 0.64 | 29.96 | 41.48 | 0.66 |
| 75 | 19.63 | 16.1  | 0.62 | 28.5  | 38.67 | 0.64 |
| 76 | 6.38  | 14.54 | 0.69 | 29.96 | 41.48 | 0.66 |

PPC – percentage of pupil contraction; MCV – maximal pupil contraction velocity; LMCV  
latency of maximal pupil contraction velocity; sec- seconds;

**Table S4 –Correlation between BVMD patients' mean and median pupilloperimetry parameters, Humphrey perimetry MD score and BCVA.**

|               |                  | <b>Humphrey<br/>(Mean Deviation, MD)</b> | <b>BCVA<br/>(Decimal)</b> |
|---------------|------------------|------------------------------------------|---------------------------|
| <b>Mean</b>   | <b>Blue PPC</b>  | r=-0.750<br>(p=0.052)                    | r=0.218<br>(p=0.638)      |
|               | <b>Blue MCV</b>  | r=-0.893<br>p=0.007                      | r=0.491<br>(p=0.263)      |
|               | <b>Blue LMCV</b> | r=-0.250<br>(p=0.589)                    | r=0.546<br>(p=0.205)      |
|               | <b>Red PPC</b>   | r=-0.107<br>(p=0.819)                    | r=-0.218<br>(p=0.638)     |
|               | <b>Red MCV</b>   | r=-0.714<br>(p=0.071)                    | r=0.709<br>(p=0.074)      |
|               | <b>Red LMCV</b>  | r=-0.357<br>(p=0.432)                    | r=0.327<br>(p=0.474)      |
| <b>Median</b> | <b>Blue PPC</b>  | r=-0.714<br>(p=0.071)                    | r=0.218<br>(p=0.638)      |
|               | <b>Blue MCV</b>  | r=-0.893<br>(p=0.007)                    | r=0.491<br>(p=0.263)      |
|               | <b>Blue LMCV</b> | r=-0.318<br>(p=0.487)                    | r=0.457<br>(p=0.302)      |
|               | <b>Red PPC</b>   | r=-0.036<br>(p=0.939)                    | r=-0.055<br>(p=0.908)     |
|               | <b>Red MCV</b>   | r=-0.821<br>(p=0.023)                    | r=0.655<br>(p=0.111)      |
|               | <b>Red LMCV</b>  | r=-0.505<br>(p= 0.247)                   | r=0.343<br>(p=0.451)      |

**Figure S1 – Pupilloperimetry test targets and pupil response parameters**

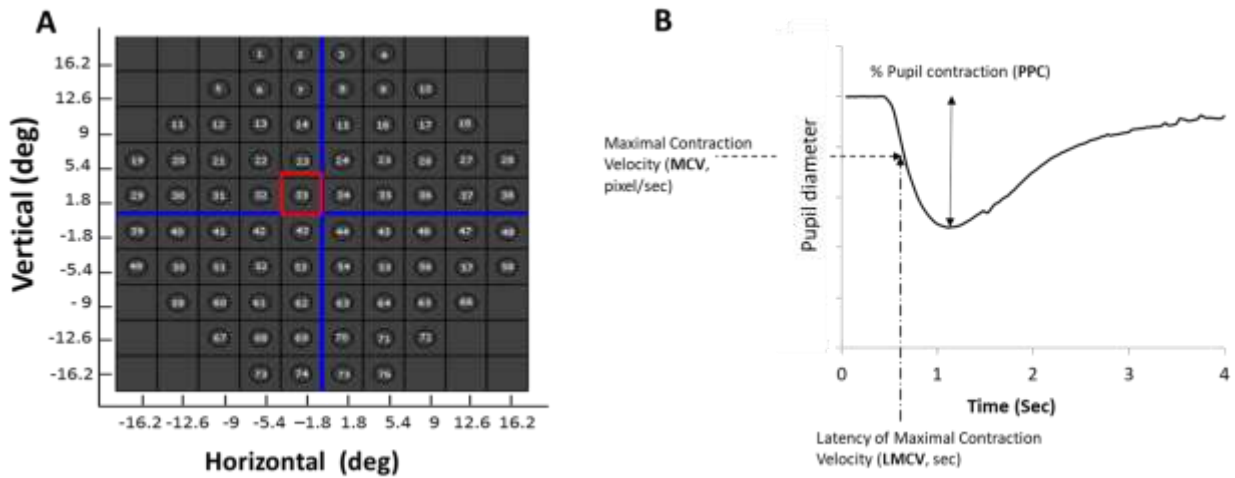

**A-** The distribution of the 76 test targets in the 16.2 degree visual field. The central targets (#33) in which LMCV in response to red light differentiated between controls and BVMD patients with high sensitivity and specificity is highlighted with a red borderline. **B-** Pupil response parameters examined in the presented study.

**Figure S2 – BVMD patients present shorter latency of pupil response compared with controls.**

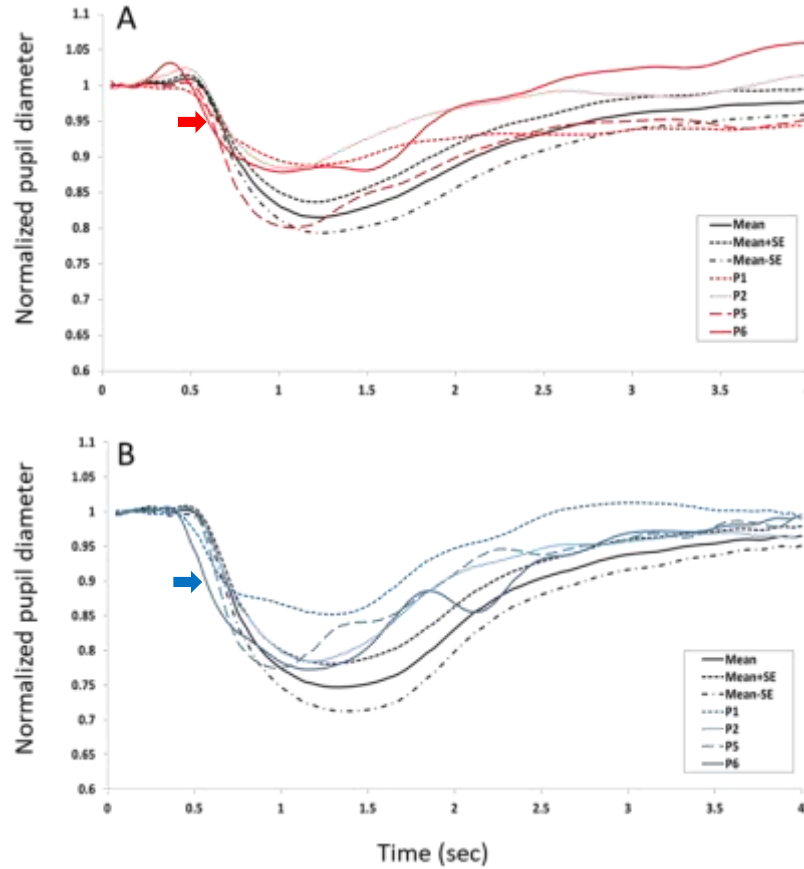

Pupil responses to red (A) and blue (B) light were recorded in central visual field test point #33. The pupil responses of each subject were normalized using the mean pupil diameter of the first three measurements taken at 0.03, 0.06 and 0.09 seconds following light onset. The mean normalized pupil diameter of control subjects is shown in a black solid line  $\pm$  standard error (SE, dashed black lines). The normalized pupil diameter recorded in four BVMD patients (p1, p2, p5, p6) is shown in colored lines. The shorter latencies of the pupil responses of patients #1, #5, and #6 are highlighted with arrows.

**Figure S3 – ROC curve for LMCV recorded in response to red light in central visual field target #33**

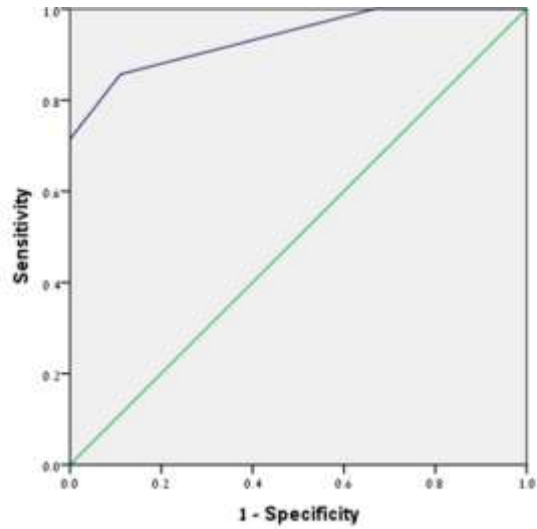

ROC curve for LMCV recorded in response to red light in the central visual field test target #33
